# Interrogating theoretical models of neural computation with deep inference

Sean R. Bittner<sup>1</sup>, Agostina Palmigiano<sup>1</sup>, Alex T. Piet<sup>2</sup>, Chunyu A. Duan<sup>3</sup>, Carlos D. Brody<sup>2</sup>,  
Kenneth D. Miller<sup>1</sup>, and John P. Cunningham<sup>4</sup>.

<sup>1</sup>Department of Neuroscience, Columbia University,

<sup>2</sup>Princeton Neuroscience Institute,

<sup>3</sup>Institute of Neuroscience, Chinese Academy of Sciences,

<sup>4</sup>Department of Statistics, Columbia University

## 1 Abstract

2 A cornerstone of theoretical neuroscience is the circuit model: a system of equations that captures  
3 a hypothesized neural mechanism. Such models are valuable when they give rise to an experimen-  
4 tally observed phenomenon – whether behavioral or in terms of neural activity – and thus can offer  
5 insights into neural computation. The operation of these circuits, like all models, critically depends  
6 on the choices of model parameters. Historically, the gold standard has been to analytically derive  
7 the relationship between model parameters and computational properties. However, this enterprise  
8 quickly becomes infeasible as biologically realistic constraints are included into the model increas-  
9 ing its complexity, often resulting in *ad hoc* approaches to understanding the relationship between  
10 model and computation. We bring recent machine learning techniques – the use of deep generative  
11 models for probabilistic inference – to bear on this problem, learning distributions of parameters  
12 that produce the specified properties of computation. Importantly, the techniques we introduce  
13 offer a principled means to understand the implications of model parameter choices on compu-  
14 tational properties of interest. We motivate this methodology with a worked example analyzing  
15 sensitivity in the stomatogastric ganglion. We then use it to generate insights into neuron-type  
16 input-responsivity in a model of primary visual cortex, a new understanding of rapid task switch-  
17 ing in superior colliculus models, and attribution of error in recurrent neural networks solving a  
18 simple mathematical task. More generally, this work suggests a departure from realism vs tractabil-  
19 ity considerations, towards the use of modern machine learning for sophisticated interrogation of  
20 biologically relevant models.

## 21 2 Introduction

22 The fundamental practice of theoretical neuroscience is to use a mathematical model to understand  
23 neural computation, whether that computation enables perception, action, or some intermediate  
24 processing [1]. A neural computation is systematized with a set of equations – the model – and  
25 these equations are motivated by biophysics, neurophysiology, and other conceptual considerations.  
26 The function of this system is governed by the choice of model parameters, which when configured  
27 in a particular way, give rise to a measurable signature of a computation. The work of analyzing a  
28 model then requires solving the inverse problem: given a computation of interest, how can we reason  
29 about these particular parameter configurations? The inverse problem is crucial for reasoning about  
30 likely parameter values, uniquenesses and degeneracies, attractor states and phase transitions, and  
31 predictions made by the model.

32 Consider the idealized practice: one carefully designs a model and analytically derives how model  
33 parameters govern the computation. Seminal examples of this gold standard (which often adopt  
34 approaches from statistical physics) include our field’s understanding of memory capacity in asso-  
35 ciative neural networks [2], chaos and autocorrelation timescales in random neural networks [3],  
36 the paradoxical effect [4], and decision making [5]. Unfortunately, as circuit models include more  
37 biological realism, theory via analytical derivation becomes intractable. This creates an unfavor-  
38 able tradeoff. On the one hand, one may tractably analyze systems of equations with unrealistic  
39 assumptions (for example symmetry or gaussianity), producing accurate inferences about param-  
40 eters of a too-simple model. On the other hand, one may choose a more biologically accurate,  
41 scientifically relevant model at the cost of *ad hoc* approaches to analysis (such as simply examining  
42 simulated activity), potentially resulting in bad inferences and thus erroneous scientific predictions  
43 or conclusions.

44 Of course, this same tradeoff has been confronted in many scientific fields characterized by the  
45 need to do inference in complex models. In response, the machine learning community has made  
46 remarkable progress in recent years, via the use of deep neural networks as a powerful inference  
47 engine: a flexible function family that can map observed phenomena (in this case the measurable  
48 signal of some computation) back to probability distributions quantifying the likely parameter  
49 configurations. One celebrated example of this approach from machine learning, of which we  
50 draw key inspiration for this work, is the variational autoencoder [6, 7], which uses a deep neural  
51 network to induce an (approximate) posterior distribution on hidden variables in a latent variable

52 model, given data. Indeed, these tools have been used to great success in neuroscience as well,  
53 in particular for interrogating parameters (sometimes treated as hidden states) in models of both  
54 cortical population activity [8, 9, 10, 11] and animal behavior [12, 13, 14]. These works have used  
55 deep neural networks to expand the expressivity and accuracy of statistical models of neural data  
56 [15].

57 However, these inference tools have not significantly influenced the study of theoretical neuroscience  
58 models, for at least three reasons. First, at a practical level, the nonlinearities and dynamics of  
59 many theoretical models are such that conventional inference tools typically produce a narrow  
60 set of insights into these models. Indeed, only in the last few years has deep learning research  
61 advanced to a point of relevance to this class of problem. Second, the object of interest from a  
62 theoretical model is not typically data itself, but rather a qualitative phenomenon – inspection of  
63 model behavior, or better, a measurable signature of some computation – an *emergent property* of  
64 the model. Third, because theoreticians work carefully to construct a model that has biological  
65 relevance, such a model as a result often does not fit cleanly into the framing of a statistical model.  
66 Technically, because many such models stipulate a noisy system of differential equations that can  
67 only be sampled or realized through forward simulation, they lack the explicit likelihood and priors  
68 central to the probabilistic modeling toolkit.

69 To address these three challenges, we developed an inference methodology – ‘emergent property  
70 inference’ – which learns a distribution over parameter configurations in a theoretical model. This  
71 distribution has two critical properties: *(i)* it is chosen such that draws from the distribution (pa-  
72 rameter configurations) correspond to systems of equations that give rise to a specified emergent  
73 property (a set of constraints); and *(ii)* it is chosen to have maximum entropy given those con-  
74 straints, such that we identify all likely parameters and can use the distribution to reason about  
75 parametric sensitivity and degeneracies [16]. First, we stipulate a bijective deep neural network that  
76 induces a flexible family of probability distributions over model parameterizations with a probabil-  
77 ity density we can calculate [17, 18, 19]. Second, we quantify the notion of emergent properties as a  
78 set of moment constraints on datasets generated by the model. Thus, an emergent property is not a  
79 single data realization, but a phenomenon or a feature of the model, which is ultimately the object  
80 of interest in theoretical neuroscience. Conditioning on an emergent property requires a variant of  
81 deep probabilistic inference methods, which we have previously introduced [20]. Third, because we  
82 can not assume the theoretical model has explicit likelihood on data or the emergent property of  
83 interest, we use stochastic gradient techniques in the spirit of likelihood free variational inference

84 [21]. Taken together, emergent property inference (EPI) provides a methodology for inferring pa-  
85 rameter configurations consistent with a particular emergent phenomena in theoretical models. We  
86 use a classic example of parametric degeneracy in a biological system, the stomatogastric ganglion  
87 [22], to motivate and clarify the technical details of EPI.

88 Equipped with this methodology, we then investigated three models of current importance in the-  
89 oretical neuroscience. These models were chosen to demonstrate generality through ranges of  
90 biological realism (from conductance-based biophysics to recurrent neural networks), neural sys-  
91 tem function (from pattern generation to abstract cognitive function), and network scale (from  
92 four to infinite neurons). First, we use EPI to produce a set of verifiable hypotheses of input-  
93 responsivity in a four neuron-type dynamical model of primary visual cortex; we then validate  
94 these hypotheses in the model. Second, we demonstrated how the systematic application of EPI to  
95 levels of task performance can generate experimentally testable hypotheses regarding connectivity  
96 in superior colliculus. Third, we use EPI to uncover the sources of error in a low-rank recurrent  
97 neural network executing a simple mathematical task. The novel scientific insights offered by EPI  
98 contextualize and clarify the previous studies exploring these models [23, 24, 25, 26], and more gen-  
99 erally, these results point to the value of deep inference models for the interrogation of biologically  
100 relevant models.

101 We note that, during our preparation and early presentation of this work [27, 28], another work  
102 has arisen with broadly similar goals: bringing statistical inference to mechanistic models of neural  
103 circuits [29, 30]. We are encouraged by this general problem being recognized by others in the  
104 community, and we emphasize that these works offer complementary neuroscientific contributions  
105 (different theoretical models of focus) and use different technical methodologies (ours is built on  
106 our prior work [20], theirs similarly [31]). These distinct methodologies and scientific investigations  
107 emphasize the increased importance and timeliness of both works.

## 108 **3 Results**

### 109 **3.1 Motivating emergent property inference of theoretical models**

110 Consideration of the typical workflow of theoretical modeling clarifies the need for emergent prop-  
111 erty inference. First, one designs or chooses an existing model that, it is hypothesized, captures  
112 the computation of interest. To ground this process in a well-known example, consider the stom-  
113 atogastric ganglion (STG) of crustaceans, a small neural circuit which generates multiple rhythmic

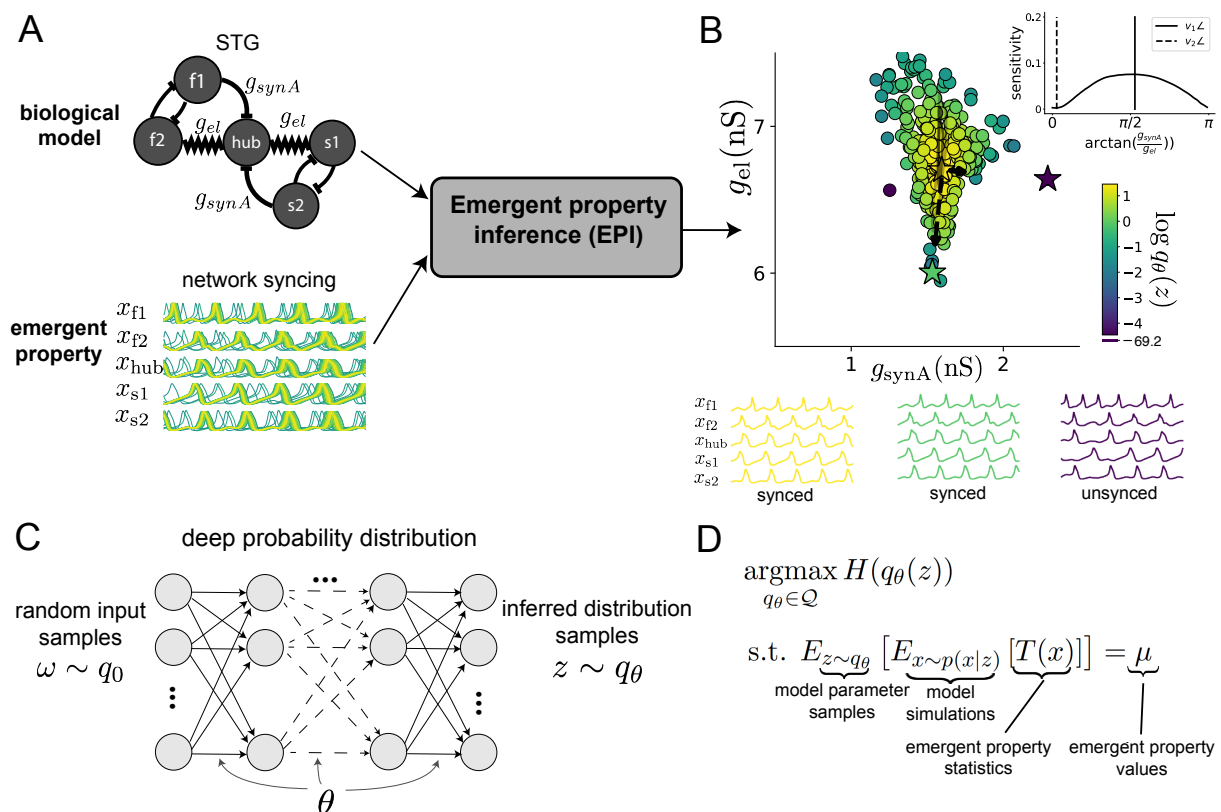

Figure 1: Emergent property inference (EPI) in the stomatogastric ganglion. A. For a choice of model (STG) and emergent property (network syncing), emergent property inference (EPI, gray box) learns a distribution of the model parameters  $z = [g_{el}, g_{synA}]$  producing network syncing. In the STG model, jagged connections indicate electrical coupling having electrical conductance  $g_{el}$ . Other connections in the diagram are inhibitory synaptic projections having strength  $g_{synA}$  onto the hub neuron, and  $g_{synB} = 5\text{nS}$  for mutual inhibitory connections. Network syncing traces are colored by log probability of their generating parameters (stars) in the EPI-inferred distribution. B. The EPI distribution of STG model parameters producing network syncing. Samples are colored by log probability density. Distribution contours of emergent property value error are shown at levels of  $5 \times 10^{-7}$  and  $1 \times 10^{-6}$  (dark and light gray). Eigenvectors of the Hessian at the mode of the inferred distribution are indicated as  $v_1$  and  $v_2$ . Simulated activity is shown for three samples (stars). (Inset) Sensitivity of the system with respect to network syncing along all dimensions of parameter space away from the mode. (see Section B.2.1). C. Deep probability distributions map a latent random variable  $w$  through a deep neural network with weights and biases  $\theta$  to parameters  $z = f_\theta(w)$  distributed as  $q_\theta(z)$ . D. EPI optimization: To learn the EPI distribution  $q_\theta(z)$  of model parameters that produce an emergent property, the emergent property statistics  $T(x)$  are set in expectation over model parameter samples  $z \sim q_\theta(z)$  and model simulations  $x \sim p(x | z)$  to emergent property values  $\mu$ .

114 muscle activation patterns for digestion [32]. Despite full knowledge of STG connectivity and a  
115 precise characterization of its rhythmic pattern generation, biophysical models of the STG have  
116 complicated relationships between circuit parameters and neural activity [22, 33]. A model of the  
117 STG [23] is shown schematically in Figure 1A, and note that the behavior of this model will be crit-  
118 ically dependent on its parameterization – the choices of conductance parameters  $z = [g_{el}, g_{synA}]$ .  
119 Specifically, the two fast neurons ( $f1$  and  $f2$ ) mutually inhibit one another, and oscillate at a faster  
120 frequency than the mutually inhibiting slow neurons ( $s1$  and  $s2$ ), and the hub neuron (hub) couples  
121 with the fast or slow population or both.

122 Second, once the model is selected, one defines the emergent property, the measurable signal of  
123 scientific interest. To continue our running STG example, one such emergent property is the  
124 phenomenon of *network syncing* – in certain parameter regimes, the frequency of the hub neuron  
125 matches that of the fast and slow populations at an intermediate frequency. This emergent property  
126 is shown in Figure 1A at a frequency of 0.54Hz.

127 Third, qualitative parameter analysis ensues: since precise mathematical analysis is intractable in  
128 this model, a brute force sweep of parameters is done [23]. Subsequently, a qualitative description  
129 is formulated to describe the different parameter configurations that lead to the emergent property.  
130 In this last step lies the opportunity for a precise quantification of the emergent property as a  
131 statistical feature of the model. Once we have such a methodology, we can infer a probability  
132 distribution over parameter configurations that produce this emergent property.

133 Before presenting technical details (in the following section), let us understand emergent property  
134 inference schematically: EPI (Fig. 1A gray box) takes, as input, the model and the specified  
135 emergent property, and as its output, produces the parameter distribution shown in Figure 1B.  
136 This distribution – represented for clarity as samples from the distribution – is then a scientifically  
137 meaningful and mathematically tractable object. In the STG model, this distribution can be specif-  
138 ically queried to reveal the prototypical parameter configuration for network syncing (the mode;  
139 Figure 1B yellow star), and how network syncing decays based on changes away from the mode.  
140 The eigenvectors (of the Hessian of the distribution at the mode) can be queried to quantitatively  
141 formalize the robustness of network syncing (Fig. 1B  $v_1$  and  $v_2$ ). Indeed, samples equidistant from  
142 the mode along these EPI-identified dimensions of sensitivity ( $v_1$ ) and degeneracy ( $v_2$ ) agree with  
143 error contours (Fig. 1B, contours) and have diminished or preserved network syncing, respectively  
144 (Figure 1B inset and activity traces). Further validation of EPI is available in the supplemen-  
145 tary materials, where we analyze a simpler model for which ground-truth statements can be made

146 (Section B.1.1).

### 147 3.2 A deep generative modeling approach to emergent property inference

148 Emergent property inference (EPI) systematizes the three-step procedure of the previous section.  
 149 First, we consider the model as a coupled set of differential (and potentially stochastic) equations  
 150 [23]. In the running STG example, its activity  $x = [x_{f1}, x_{f2}, x_{hub}, x_{s1}, x_{s2}]$  is the membrane potential  
 151 for each neuron, which evolves according to the biophysical conductance-based equation:

$$C_m \frac{dx}{dt} = -h(x; z) = -[h_{leak}(x; z) + h_{Ca}(x; z) + h_K(x; z) + h_{hyp}(x; z) + h_{elec}(x; z) + h_{syn}(x; z)] \quad (1)$$

152 where  $C_m = 1nF$ , and  $h_{leak}$ ,  $h_{Ca}$ ,  $h_K$ ,  $h_{hyp}$ ,  $h_{elec}$ ,  $h_{syn}$  are the leak, calcium, potassium, hyperpolar-  
 153 ization, electrical, and synaptic currents, all of which have their own complicated dependence on  $x$   
 154 and  $z = [g_{el}, g_{synA}]$  (see Section B.2.1).

155 Second, we define the emergent property, which as above is network syncing: oscillation of the  
 156 entire population at an intermediate frequency of our choosing (Figure 1A bottom). Quantifying  
 157 this phenomenon is straightforward: we define network syncing to be that each neuron’s spiking  
 158 frequency – denoted  $\omega_{f1}(x)$ ,  $\omega_{f2}(x)$ , etc. – is close to an intermediate frequency of 0.542Hz. Math-  
 159 ematically, we achieve this via constraints on the mean and variance of  $\omega_\alpha(x)$  for each neuron  
 160  $\alpha \in \{f1, f2, hub, s1, s2\}$ , and thus:

$$\mathbb{E}[T(x)] \triangleq \mathbb{E} \begin{bmatrix} \omega_{f1}(x) \\ \vdots \\ (\omega_{f1}(x) - 0.542)^2 \\ \vdots \end{bmatrix} = \begin{bmatrix} 0.542 \\ \vdots \\ 0.025^2 \\ \vdots \end{bmatrix} \triangleq \mu, \quad (2)$$

161 which completes the quantification of the emergent property.

162 Third, we perform emergent property inference: we find a distribution over parameter configura-  
 163 tions  $z$ , and insist that samples from this distribution produce the emergent property; in other  
 164 words, they obey the constraints introduced in Equation 2. This distribution will be chosen from  
 165 a family of probability distributions  $\mathcal{Q} = \{q_\theta(z) : \theta \in \Theta\}$ , defined by a deep generative distribution  
 166 of the normalizing flow class [17, 18, 19] – neural networks which transform a simple distribution  
 167 into a suitably complicated distribution (as is needed here). This deep distribution is represented  
 168 in Figure 1C (see Section B.1). Then, mathematically, we must solve the following optimization

169 program:

$$\begin{aligned} & \operatorname{argmax}_{q_\theta \in \mathcal{Q}} H(q_\theta(z)) \\ & \text{s.t. } \mathbb{E}_{z \sim q_\theta} [\mathbb{E}_{x \sim p(x|z)} [T(x)]] = \mu, \end{aligned} \tag{3}$$

170 where  $T(x), \mu$  are defined as in Equation 2, and  $p(x|z)$  is the intractable distribution of data from  
171 the model,  $x$ , given that model’s parameters  $z$  (we access samples from this distribution by running  
172 the model forward). The purpose of each element in this program is detailed in Figure 1D. Finally,  
173 we recognize that many distributions in  $\mathcal{Q}$  will respect the emergent property constraints, so we  
174 require a normative principle to select amongst them. This principle is captured in Equation 3 by  
175 the primal objective  $H$ . Here we chose Shannon entropy as a means to find parameter distributions  
176 with minimal assumptions beyond some chosen structure [34, 35, 20, 36], but we emphasize that  
177 the EPI method is unaffected by this choice (but the results of course will depend on the primal  
178 objective chosen).

179 EPI optimizes the weights and biases  $\theta$  of the deep neural network (which induces the probability  
180 distribution) by iteratively solving Equation 3. The optimization is complete when the sampled  
181 models with parameters  $z \sim q_\theta$  produce activity consistent with the specified emergent property.  
182 Such convergence is evaluated with a hypothesis test that the mean of each emergent property  
183 statistic is not different than its emergent property value (see Section B.1.2). In relation to broader  
184 methodology, inspection of the EPI objective reveals a natural relationship to posterior inference.  
185 Specifically, EPI executes variational inference in an exponential family model, the sufficient statis-  
186 tics and mean parameter of which are defined by the emergent property statistics and values,  
187 respectively (see Section B.1.4). Equipped with this method, we now prove out the value of EPI by  
188 using it to investigate and produce novel insights about three prominent models in neuroscience.

### 189 **3.3 Comprehensive input-responsivity in a nonlinear sensory system**

190 Dynamical models of excitatory (E) and inhibitory (I) populations with superlinear input-output  
191 function have succeeded in explaining a host of experimentally documented phenomena. In a regime  
192 characterized by inhibitory stabilization of strong recurrent excitation, these models gives rise to  
193 paradoxical responses [4], selective amplification [37], surround suppression [38] and normalization  
194 [39]. Despite their strong predictive power, E-I circuit models rely on the assumption that inhibi-  
195 tion can be studied as an indivisible unit. However, experimental evidence shows that inhibition  
196 is composed of distinct elements – parvalbumin (P), somatostatin (S), VIP (V) – composing 80%



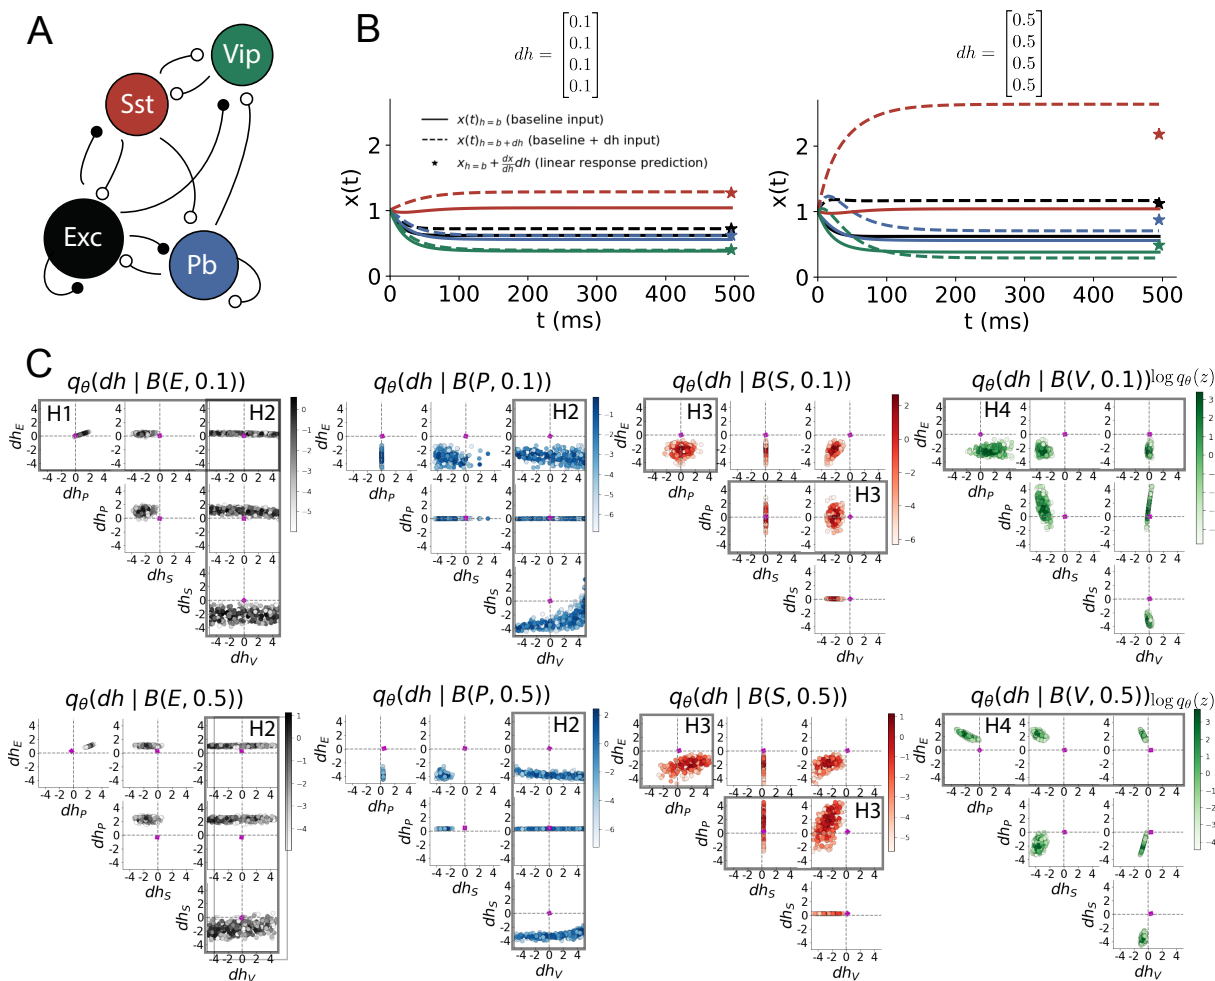

Figure 2: Hypothesis generation through EPI in a V1 model. A. Four-population model of primary visual cortex with excitatory (black), parvalbumin (blue), somatostatin (red), and VIP (green) neurons. Some neuron-types largely do not form synaptic projections to others (excitatory and inhibitory projections filled and unfilled, respectively). B. Linear response predictions become inaccurate with greater input strength. V1 model simulations for input (solid)  $h = b$  and (dashed)  $h = b + dh$ . Stars indicate the linear response prediction. C. EPI distributions on differential input  $dh$  conditioned on differential response  $B(\alpha, y)$ . Supporting evidence for the four generated hypotheses are indicated by gray boxes with labels H1, H2, H3, and H4. The linear prediction from two standard deviations away from  $y$  (from negative to positive) is overlaid in magenta (very small, near origin).

197 of GABAergic interneurons in V1 [40, 41, 42], and that these inhibitory cell types follow specific  
198 connectivity patterns (Fig. 2A) [43]. Recent theoretical advances [24, 44, 45], have only started  
199 to address the consequences of this multiplicity in the dynamics of V1, strongly relying on linear  
200 theoretical tools. Here, we go beyond linear theory by systematically generating and evaluating hy-  
201 potheses of circuit model function using EPI distributions of neuron-type inputs producing various  
202 neuron-type population responses.

203 Specifically, we consider a four-dimensional circuit model with dynamical state given by the firing  
204 rate  $x$  of each neuron-type population  $x = [x_E, x_P, x_S, x_V]^\top$ . Given a time constant of  $\tau = 20$  ms  
205 and a power  $n = 2$ , the dynamics are driven by the rectified and exponentiated sum of recurrent  
206 ( $Wx$ ) and external  $h$  inputs:

$$\tau \frac{dx}{dt} = -x + [Wx + h]_+^n. \quad (4)$$

207 The effective connectivity weights  $W$  were obtained from experimental recordings of publicly avail-  
208 able datasets of mouse V1 [46, 47] (see Section B.2.2). The input  $h = b + dh$  is comprised of a  
209 baseline input  $b = [b_E, b_P, b_S, b_V]^\top$  and a differential input  $dh = [dh_E, dh_P, dh_S, dh_V]^\top$  to each  
210 neuron-type population. Throughout subsequent analyses, the baseline input is  $b = [1, 1, 1, 1]^\top$ .

211 With this model, we are interested in the differential responses of each neuron-type population to  
212 changes in input  $dh$ . Initially, we studied the linearized response of the system to input  $\frac{dx_{ss}}{dh}$  at the  
213 steady state response  $x_{ss}$ , i.e. a fixed point. All analyses of this model consider the steady state  
214 response, so we drop the notation  $ss$  from here on. While this linearization accurately predicts  
215 differential responses  $dx = [dx_E, dx_P, dx_S, dx_V]$  for small differential inputs to each population  
216  $dh = [0.1, 0.1, 0.1, 0.1]$  (Fig 2B left), the linearization is a poor predictor in this nonlinear model  
217 more generally (Fig. 2B right). Currently available approaches to deriving the steady state response  
218 of the system are limited.

219 To get a more comprehensive picture of the input-responsivity of each neuron-type beyond linear  
220 theory, we used EPI to learn a distribution of the differential inputs to each population  $dh$  that  
221 produce an increase of  $y \in \{0.1, 0.5\}$  in the rate of each neuron-type population  $\alpha \in \{E, P, S, V\}$ .  
222 We want to know the differential inputs  $dh$  that result in a differential steady state  $dx_\alpha$  (the change  
223 in  $x_\alpha$  when receiving input  $h = b + dh$  with respect to the baseline  $h = b$ ) of value  $y$  with some small,

224 arbitrarily chosen amount of variance  $0.01^2$ . These statements amount to the emergent property

$$\mathcal{B}(\alpha, y) \triangleq \mathbb{E} \begin{bmatrix} dx_\alpha \\ (dx_\alpha - y)^2 \end{bmatrix} = \begin{bmatrix} y \\ 0.01^2 \end{bmatrix} \quad (5)$$

225 We maintain the notation  $\mathcal{B}(\cdot)$  throughout the rest of the study as short hand for emergent prop-  
 226 erty, which represents a different signature of computation in each application. In each column of  
 227 Figure 2C visualizes the inferred distribution, available through EPI, of  $dh$  corresponding to an  
 228 excitatory (red), parvalbumin (blue), somatostatin (red) and VIP (green) neuron-type increase,  
 229 while each row corresponds to amounts of increase 0.1 and 0.5. For each pair of parameters, we  
 230 show the two-dimensional marginal distribution of samples colored by  $\log q_\theta(dh | \mathcal{B}(\alpha, y))$ . The  
 231 inferred distributions immediately suggest four hypotheses:

232

233 H1: as is intuitive, each neuron-type's firing rate should be sensitive to that neuron-type's  
 234 direct input (e.g. Fig. 2C H1 gray boxes indicate low variance in  $dh_E$  when  $\alpha = E$ . Same  
 235 observation in all inferred distributions);

236 H2: the E- and P-populations should be largely unaffected by input to the V-population (Fig.  
 237 2C H2 gray boxes indicate high variance in  $dh_V$  when  $\alpha \in \{E, P\}$ );

238 H3: the S-population should be largely unaffected by input to the P-population (Fig. 2C H3  
 239 gray boxes indicate high variance in  $dh_P$  when  $\alpha = S$ );

240 H4: there should be a nonmonotonic response of the V-population with input to the E-  
 241 population (Fig. 2C H4 gray boxes indicate that negative  $dh_E$  should result in small  $dx_V$ ,  
 242 but positive  $dh_E$  should elicit a larger  $dx_V$ );

243 We evaluate these hypotheses by taking steps in individual neuron-type input  $\delta h_\alpha$  away from the  
 244 modes of the inferred distributions at  $y = 0.1$

$$dh^* = z^* = \underset{z}{\operatorname{argmax}} \log q_\theta(z | \mathcal{B}(\alpha, 0.1)). \quad (6)$$

245 Here  $\delta x_\alpha$  is the change in steady state response to the system with input  $h = b + dh^* + \delta h_\alpha \hat{u}_\alpha$   
 246 compared to  $h = b + dh^*$ , where  $\hat{u}_\alpha$  is a unit vector in the dimension of  $\alpha$ . The EPI-generated  
 247 hypotheses are confirmed:

248 H1: the neuron-type responses are sensitive to their direct inputs (Fig. 3A black, 3B blue,  
 249 3C red, 3D green);

250 H2: the E- and P-populations are not affected by  $\delta h_V$  (Fig. 3A green, 3B green);

251 H3: the S-population is not affected by  $\delta h_P$  (Fig. 3C blue);

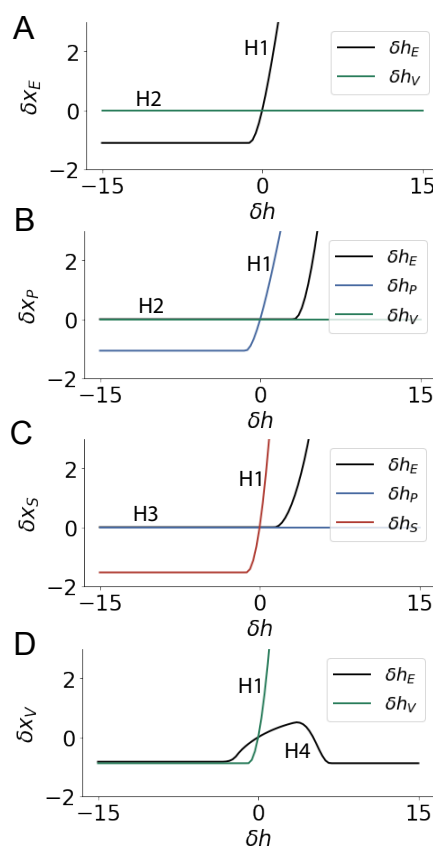

Figure 3: Confirming EPI generated hypotheses in V1. A. Differential responses by the E-population to changes in individual input  $\delta h_\alpha \hat{u}_\alpha$  away from the mode of the EPI distribution  $dh^*$ . B-D Same plots for the P-, S-, and V-populations. Labels H1, H2, H3, and H4 indicate which curves confirm which hypotheses.

252 H4: the V-population exhibits a nonmonotonic response to  $\delta h_E$  (Fig. 3D black), and is in  
 253 fact the only population to do so (Fig. 3A-C black).

254 These hypotheses were in stark contrast to what was available to us via traditional analytical linear  
 255 prediction (Fig. 2C, magenta). To this point, we have shown the utility of EPI on relatively low-  
 256 level emergent properties like network syncing and differential neuron-type population responses.  
 257 In the remainder of the study, we focus on using EPI to understand models of more abstract  
 258 cognitive function.

### 259 3.4 Identifying neural mechanisms of flexible task switching

260 In a rapid task switching experiment [48], rats were explicitly cued on each trial to either orient  
 261 towards a visual stimulus in the Pro (P) task or orient away from a visual stimulus in the Anti  
 262 (A) task (Fig. 4a). Neural recordings in the midbrain superior colliculus (SC) exhibited two  
 263 populations of neurons that simultaneously represented both task context (Pro or Anti) and motor  
 264 response (contralateral or ipsilateral to the recorded side): the Pro/Contra and Anti/Ipsi neurons  
 265 [25]. Duan et al. proposed a model of SC that, like the V1 model analyzed in the previous section, is

266 a four-population dynamical system. We analyzed this model, where the neuron-type populations  
267 are functionally-defined as the Pro- and Anti-populations in each hemisphere (left (L) and right  
268 (R)). The Pro- or Anti-populations receive an input determined by the cue, and then the left and  
269 right populations receive an input based on the side of the light stimulus. Activities were bounded  
270 between 0 and 1, so that a high output of the Pro population in a given hemisphere corresponds  
271 to the contralateral response. An additional stipulation is that when one Pro population responds  
272 with a high-output, the opposite Pro population must respond with a low output. Finally, this  
273 circuit operates in the presence of Gaussian noise resulting in trial-to-trial variability (see Section  
274 B.2.3). The connectivity matrix is parameterized by the geometry of the population arrangement  
275 (Fig. 4B).

276 Here, we used EPI to learn distributions of the SC weight matrix parameters  $z = W$  conditioned  
277 on of various levels of rapid task switching accuracy  $\mathcal{B}(p)$  for  $p \in \{50\%, 60\%, 70\%, 80\%, 90\%\}$  (see  
278 Section B.2.3). Following the approach in Duan et al., we decomposed the connectivity matrix  
279  $W = V\Lambda V^{-1}$  in such a way (the Schur decomposition) that the basis vectors  $v_i$  are the same for all  
280  $W$  (Fig. 4C). These basis vectors have intuitive roles in processing for this task, and are accordingly  
281 named the *all* mode - all neurons co-fluctuate, *side* mode - one side dominates the other, *task* mode  
282 - the Pro or Anti populations dominate the other, and *diag* mode - Pro- and Anti-populations of  
283 opposite hemispheres dominate the opposite pair. The corresponding eigenvalues (e.g.  $\lambda_{\text{task}}$ , which  
284 change according to  $W$ ) indicate the degree to which activity along that mode is increased or  
285 decreased by  $W$ .

286 EPI demonstrates that, for greater task accuracies, the task mode eigenvalue increases, indicating  
287 the importance of  $W$  to the task representation (Fig. 4D, purple). Stepping from random chance  
288 (50%) networks to marginally task-performing (60%) networks, there is a marked decrease of the  
289 side mode eigenvalues (Fig. 4D, orange). Such side mode suppression remains in the models achiev-  
290 ing greater accuracy, revealing its importance towards task performance. There were no interesting  
291 trends with task accuracy in the all or diag mode (hence not shown in Fig. 4). Importantly, we can  
292 conclude from our methodology that side mode suppression in  $W$  allows rapid task switching, and  
293 that greater task-mode representations in  $W$  increase accuracy. These hypotheses are confirmed by  
294 forward simulation of the SC model (Fig. 4E). Thus, EPI produces novel, experimentally testable  
295 predictions: increase in rapid task switching performance should be correlated with changes in  
296 effective connectivity resulting in an increase in task mode and decrease in side mode eigenvalues.

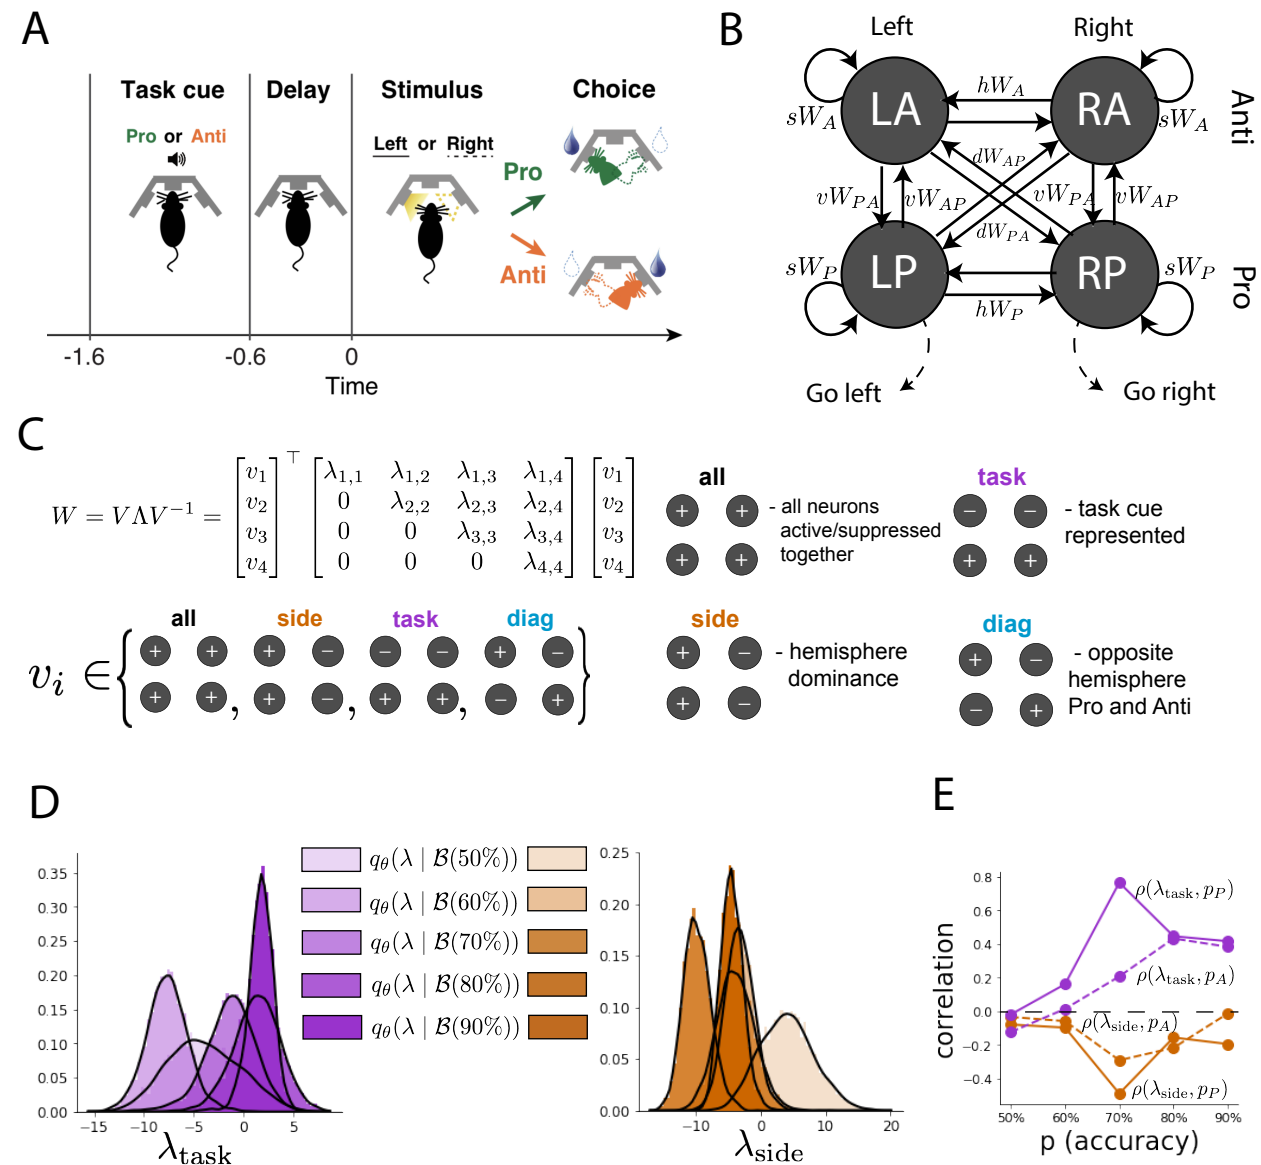

Figure 4: EPI reveals changes in SC [25] connectivity that control task accuracy. A. Rapid task switching behavioral paradigm (see text). B. Model of superior colliculus (SC). Neurons: LP - left pro, RP - right pro, LA - left anti, RA - right anti. Parameters: sW - self, hW - horizontal, vW - vertical, dW - diagonal weights. C. The Schur decomposition of the weight matrix  $W = V\Lambda V^{-1}$  is a unique decomposition with orthogonal  $V$  and upper triangular  $\Lambda$ . Schur modes:  $v_{\text{all}}$ ,  $v_{\text{task}}$ ,  $v_{\text{side}}$ , and  $v_{\text{diag}}$ . D. The marginal EPI distributions of the Schur eigenvalues at each level of task accuracy. E. The correlation of Schur eigenvalue with task performance in each learned EPI distribution.

### 297 3.5 Linking RNN connectivity to error

298 So far, each model we have studied was designed from fundamental biophysical principles, genetically-  
 299 or functionally-defined neuron types. At a more abstract level of modeling, recurrent neural net-  
 300 works (RNNs) are high-dimensional dynamical models of computation that are becoming increas-  
 301 ingly popular in neuroscience research [49]. In theoretical neuroscience, RNN dynamics usually  
 302 follow the equation

$$\frac{dx}{dt} = -x + W\phi(x) + h, \quad (7)$$

303 where  $x$  is the network activity,  $W$  is the network connectivity,  $\phi(\cdot) = \tanh(\cdot)$ , and  $h$  is the input to  
 304 the system. Such RNNs are trained to do a task from a systems neuroscience experiment, and then  
 305 the unit activations of the trained RNN are compared to recorded neural activity. Fully-connected  
 306 RNNs with tens of thousands of parameters are challenging to characterize [50], especially making  
 307 statistical inferences about their parameterization. Alternatively, we considered a rank-1,  $N$ -neuron  
 308 RNN with connectivity

$$W = g\chi + \frac{1}{N}mn^\top, \quad (8)$$

309 where  $\chi_{i,j} \sim \mathcal{N}(0, \frac{1}{N})$ ,  $g$  is the random strength, and the entries of  $m$  and  $n$  are drawn from Gaussian  
 310 distributions  $m_i \sim \mathcal{N}(M_m, 1)$  and  $n_i \sim \mathcal{N}(M_n, 1)$ . We used EPI to infer the parameterizations of  
 311 rank-1 RNNs solving an example task, enabling discovery of properties of connectivity that result  
 312 in different types of error in the computation.

313 The task we consider is Gaussian posterior conditioning: calculate the parameters of a posterior  
 314 distribution induced by a prior  $p(\mu_y) = \mathcal{N}(\mu_0 = 4, \sigma_0^2 = 1)$  and a likelihood  $p(y|\mu_y) = \mathcal{N}(\mu_y, \sigma_y^2 =$   
 315  $1)$ , given a single observation  $y$ . Conjugacy offers the result analytically;  $p(\mu_y|y) = \mathcal{N}(\mu_{\text{post}}, \sigma_{\text{post}}^2)$ ,  
 316 where:

$$\mu_{\text{post}} = \frac{\frac{\mu_0}{\sigma_0^2} + \frac{y}{\sigma_y^2}}{\frac{1}{\sigma_0^2} + \frac{1}{\sigma_y^2}} \quad \sigma_{\text{post}}^2 = \frac{1}{\frac{1}{\sigma_0^2} + \frac{1}{\sigma_y^2}}. \quad (9)$$

317 The RNN is trained to solve this task by producing readout activity that is on average the posterior  
 318 mean  $\mu_{\text{post}}$ , and activity whose variability is the posterior variance  $\sigma_{\text{post}}^2$  (Fig. 5A, a setup inspired  
 319 by [51]). To solve this Gaussian posterior conditioning task, the RNN response to a constant input  
 320  $h(t) = yw + (n - M_n)$  must equal the posterior mean along readout vector  $r$ , where

$$\kappa_r = \frac{1}{N} \sum_{j=1}^N r_j \phi(x_j) \quad (10)$$

321 Additionally, the amount of chaotic variance  $\Delta_T$  must equal the posterior variance. Theory for  
 322 low-rank RNNs allows us to express  $\kappa_r$  and  $\Delta_T$  in terms of each other through a solvable system

323 of nonlinear equations (see Section B.2.4) [26]. This allows us to mathematically formalize the  
 324 execution of this task into an emergent property, where the emergent property statistics of the  
 325 RNN activity are  $\kappa_r$  and  $\Delta_T$  and the emergent property values are the ground truth posterior  
 326 mean  $\mu_{\text{post}}$  and variance  $\sigma_{\text{post}}^2$ :

$$E \begin{bmatrix} \kappa_r \\ \Delta_T \\ (\kappa_r - \mu_{\text{post}})^2 \\ (\Delta_T^2 - \sigma_{\text{post}}^2)^2 \end{bmatrix} = \begin{bmatrix} \mu_{\text{post}} \\ \sigma_{\text{post}}^2 \\ 0.1 \\ 0.1 \end{bmatrix} \quad (11)$$

327 We specify a substantial amount of variance in these emergent property statistics, so that the  
 328 inferred distribution results in RNNs with a variety errors in their solutions to the gaussian posterior  
 329 conditioning problem.

330 We used EPI to learn distributions of RNN connectivity properties  $z = [g \ M_m \ M_n]$  executing  
 331 Gaussian posterior conditioning given an input of  $y = 2$  (see Section B.2.4) (Fig. 5B). The true  
 332 Gaussian conditioning posterior for an input of  $y = 2$  is  $\mu_{\text{post}} = 3$  and  $\sigma_{\text{post}} = 0.5$ . We examined the  
 333 nature of the over- and under-estimation of the posterior means (Fig. 5B, left) and variances (Fig.  
 334 5B, right) in the inferred distributions. There is rough symmetry in the  $M_m$ - $M_n$  plane, suggesting  
 335 a degeneracy in the product of  $M_m$  and  $M_n$  (Fig. 5B). The product of  $M_m$  and  $M_n$  strongly  
 336 determines the posterior mean (Fig. 5B, left), and the random strength  $g$  is the most influential  
 337 variable on the chaotic variance (Fig. 5B, right). Neither of these observations were obvious from  
 338 what mathematical analysis is available in networks of this type (see Section B.2.4). While the  
 339 relationship of the random strength to chaotic variance (and resultingly posterior variance in this  
 340 problem) is well-known [3], the distribution admits a hypothesis: the estimation of the posterior  
 341 mean by the RNN increases with the product of  $M_m$  and  $M_n$ .

342 We tested this prediction by taking parameters  $z_1$  and  $z_2$  as representative samples from the positive  
 343 and negative  $M_m$ - $M_n$  quadrants, respectively. Instead of using the theoretical predictions shown  
 344 in Figure 5B, we simulated finite-size realizations of these networks with 2,000 neurons (e.g. Fig.  
 345 5C). We perturbed these parameter choices by the product  $M_m M_n$  clarifying that the posterior  
 346 mean can be directly controlled in this way (Fig. 5D). Thus, EPI confers a clear picture of error in  
 347 this computation: the product of the low rank vector means  $M_m$  and  $M_n$  modulates the estimated  
 348 posterior mean while the random strength  $g$  modulates the estimated posterior variance. This  
 349 novel procedure of inference on reduced parameterizations of RNNs conditioned on the emergent  
 350 property of task execution is generalizable to other settings modeled in [26] like noisy integration



351 and context-dependent decision making (Fig. S4).

## 352 4 Discussion

### 353 4.1 EPI is a general tool for theoretical neuroscience

354 Biologically realistic models of neural circuits are comprised of complex nonlinear differential equa-  
355 tions, making traditional theoretical analysis and statistical inference intractable. In contrast, EPI  
356 is capable of learning distributions of parameters in such models producing measurable signatures  
357 of computation. We have demonstrated its utility on biological models (STG), intermediate-level  
358 models of interacting genetically- and functionally-defined neuron-types (V1, SC), and the most  
359 abstract of models (RNNs). We are able to condition both deterministic and stochastic models on  
360 low-level emergent properties like spiking frequency of membrane potentials, as well as high-level  
361 cognitive function like posterior conditioning. Technically, EPI is tractable when the emergent  
362 property statistics are continuously differentiable with respect to the model parameters, which is  
363 very often the case; this emphasizes the general applicability of EPI.

364 In this study, we have focused on applying EPI to low dimensional parameter spaces of models  
365 with low dimensional dynamical states. These choices were made to present the reader with a  
366 series of interpretable conclusions, which is more challenging in high dimensional spaces. In fact,  
367 EPI should scale reasonably to high dimensional parameter spaces, as the underlying technology has  
368 produced state-of-the-art performance on high-dimensional tasks such as texture generation [20]. Of  
369 course, increasing the dimensionality of the dynamical state of the model makes optimization more  
370 expensive, and there is a practical limit there as with any machine learning approach. Although,  
371 theoretical approaches (e.g. [26]) can be used to reason about the wholistic activity of such high  
372 dimensional systems by introducing some degree of additional structure into the model.

373 There are additional technical considerations when assessing the suitability of EPI for a particu-  
374 lar modeling question. First and foremost, as in any optimization problem, the defined emergent  
375 property should always be appropriately conditioned (constraints should not have wildly different  
376 units). Furthermore, if the program is underconstrained (not enough constraints), the distribution  
377 grows (in entropy) unstably unless mapped to a finite support. If overconstrained, there is no pa-  
378 rameter set producing the emergent property, and EPI optimization will fail (appropriately). Next,  
379 one should consider the computational cost of the gradient calculations. In the best circumstance,  
380 there is a simple, closed form expression (e.g. Section B.1.1) for the emergent property statistic

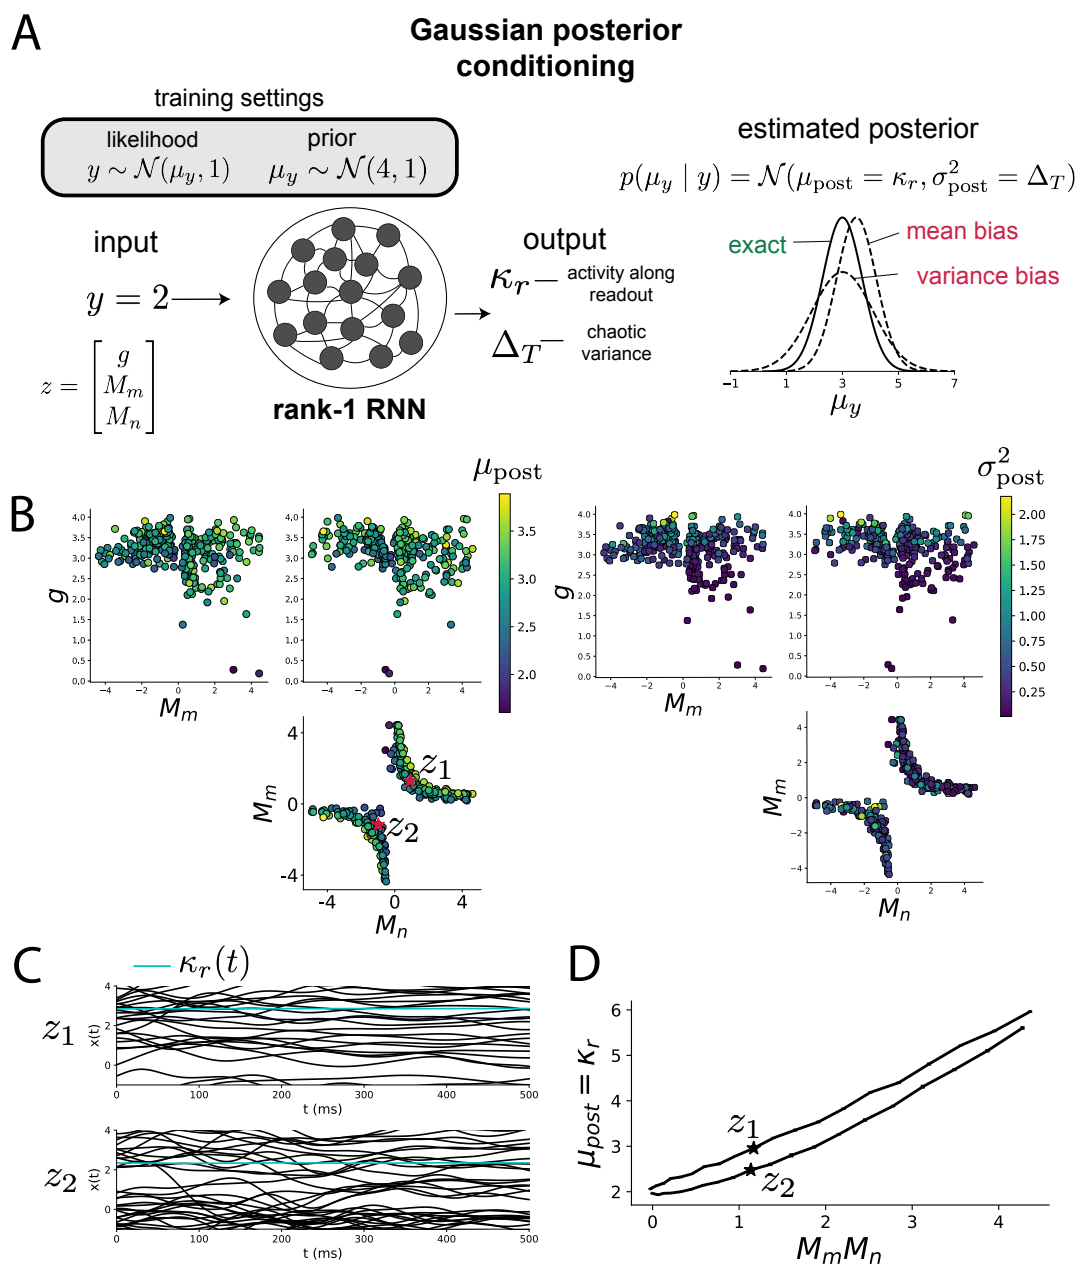

Figure 5: Sources of error in an RNN solving a simple task. A. (left) A rank-1 RNN executing a Gaussian posterior conditioning computation on  $\mu_y$ . (right) Error in this computation can come from over- or under-estimating the posterior mean or variance. B. EPI distribution of rank-1 RNNs executing Gaussian posterior conditioning. Samples are colored by (left) posterior mean  $\mu_{\text{post}} = \kappa_r$  and (right) posterior variance  $\sigma_{\text{post}}^2 = \Delta_T$ . C. Finite-size network simulations of 2,000 neurons with parameters  $z_1$  and  $z_2$  sampled from the inferred distribution. Activity along readout  $\kappa_r$  (cyan) is stable despite chaotic fluctuations. D. The posterior mean computed by RNNs parameterized by  $z_1$  and  $z_2$  perturbed in the dimension of the product of  $M_m$  and  $M_n$ . Means and standard errors are shown across 10 realizations of 2,000-neuron networks.

381 given the model parameters. On the other end of the spectrum, many forward simulation iterations  
382 may be required before a high quality measurement of the emergent property statistic is available  
383 (e.g. Section B.2.1). In such cases, optimization will be expensive.

## 384 4.2 Novel hypotheses from EPI

385 In neuroscience, machine learning has primarily been used to revealed structure in large-scale neural  
386 datasets [52, 53, 54, 55, 56, 57] (see review, [15]). Such careful inference procedures are developed  
387 for these statistical models allowing precise, quantitative reasoning, which clarifies the way data  
388 informs knowledge of the model parameters. However, these inferable statistical models lack re-  
389 semblance to the underlying biology, making it unclear how to go from the structure revealed by  
390 these methods, to the neural mechanisms giving rise to it. In contrast, theoretical neuroscience has  
391 focused on careful mechanistic modeling and the production of emergent properties of computation.  
392 The careful steps of 1.) model design and 2.) emergent property definition, are followed by 3.)  
393 practical inference methods resulting in an opaque characterization of the way model parameters  
394 govern computation. In this work, we replaced this opaque procedure of parameter identification  
395 in theoretical neuroscience with emergent property inference, opening the door to careful inference  
396 in careful models of neural computation.

397 Biologically realistic models of neural circuits often prove formidable to analyze. For example,  
398 consider the fact that we do not fully understand the (only) four-dimensional models of V1 [24]  
399 and SC [25]. Because analytical approaches to studying nonlinear dynamical systems become  
400 increasingly complicated when stepping from two-dimensional to three- or four-dimensional systems  
401 in the absence of restrictive simplifying assumptions [58], it is unsurprising that these models pose a  
402 challenge. In Section 3.3, we showed that EPI was far more informative about neuron-type input-  
403 responsivity than the predictions afforded through the available linear analytical methods. By  
404 flexibly conditioning this V1 model on different emergent properties, we performed an exploratory  
405 analysis of a *model* rather than a dataset, which generated a set of testable hypotheses, which  
406 were proved out. Of course, exploratory analyses can be directed towards formulating hypotheses  
407 of a specific form. For example, when interested in model parameter changes with behavioral  
408 performance, one can use EPI to condition on various levels of task accuracy as we did in Section  
409 3.4. This analysis identified experimentally testable predictions (proved out *in-silico*) of patterns  
410 of effective connectivity in SC that should be correlated with increased performance.

411 In our final analysis, we presented a novel procedure for doing statistical inference on interpretable

412 parameterizations of RNNs executing simple tasks. Specifically, we analyzed RNNs solving a pos-  
413 terior conditioning problem in the spirit of [51]. This methodology relies on recently extended  
414 theory of responses in random neural networks with minimal structure [26]. While we focused on  
415 rank-1 RNNs, which were sufficient for solving this task, we can more generally use this approach  
416 to analyze rank-2 and greater RNNs. The ability to apply the probabilistic model selection toolkit  
417 to such black box models should prove invaluable as their use in neuroscience increases.

## 418 References

- 419 [1] Larry F Abbott. Theoretical neuroscience rising. *Neuron*, 60(3):489–495, 2008.
- 420 [2] John J Hopfield. Neural networks and physical systems with emergent collective computational  
421 abilities. *Proceedings of the national academy of sciences*, 79(8):2554–2558, 1982.
- 422 [3] Haim Sompolinsky, Andrea Crisanti, and Hans-Jurgen Sommers. Chaos in random neural  
423 networks. *Physical review letters*, 61(3):259, 1988.
- 424 [4] Misha V Tsodyks, William E Skaggs, Terrence J Sejnowski, and Bruce L McNaughton. Para-  
425 doxical effects of external modulation of inhibitory interneurons. *Journal of neuroscience*,  
426 17(11):4382–4388, 1997.
- 427 [5] Kong-Fatt Wong and Xiao-Jing Wang. A recurrent network mechanism of time integration in  
428 perceptual decisions. *Journal of Neuroscience*, 26(4):1314–1328, 2006.
- 429 [6] Diederik P Kingma and Max Welling. Auto-encoding variational bayes. *International Confer-*  
430 *ence on Learning Representations*, 2014.
- 431 [7] Danilo Jimenez Rezende, Shakir Mohamed, and Daan Wierstra. Stochastic backpropagation  
432 and variational inference in deep latent gaussian models. *International Conference on Machine*  
433 *Learning*, 2014.
- 434 [8] Yuanjun Gao, Evan W Archer, Liam Paninski, and John P Cunningham. Linear dynamical  
435 neural population models through nonlinear embeddings. In *Advances in neural information*  
436 *processing systems*, pages 163–171, 2016.
- 437 [9] Yuan Zhao and Il Memming Park. Recursive variational bayesian dual estimation for nonlinear  
438 dynamics and non-gaussian observations. *stat*, 1050:27, 2017.

- 439 [10] Gabriel Barello, Adam Charles, and Jonathan Pillow. Sparse-coding variational auto-encoders.  
440 *bioRxiv*, page 399246, 2018.
- 441 [11] Chethan Pandarinath, Daniel J O’Shea, Jasmine Collins, Rafal Jozefowicz, Sergey D Stavisky,  
442 Jonathan C Kao, Eric M Trautmann, Matthew T Kaufman, Stephen I Ryu, Leigh R Hochberg,  
443 et al. Inferring single-trial neural population dynamics using sequential auto-encoders. *Nature*  
444 *methods*, page 1, 2018.
- 445 [12] Alexander B Wiltschko, Matthew J Johnson, Giuliano Iurilli, Ralph E Peterson, Jesse M  
446 Katon, Stan L Pashkovski, Victoria E Abaira, Ryan P Adams, and Sandeep Robert Datta.  
447 Mapping sub-second structure in mouse behavior. *Neuron*, 88(6):1121–1135, 2015.
- 448 [13] Matthew J Johnson, David K Duvenaud, Alex Wiltschko, Ryan P Adams, and Sandeep R  
449 Datta. Composing graphical models with neural networks for structured representations and  
450 fast inference. In *Advances in neural information processing systems*, pages 2946–2954, 2016.
- 451 [14] Eleanor Batty, Matthew Whiteway, Shreya Saxena, Dan Biderman, Taiga Abe, Simon Musall,  
452 Winthrop Gillis, Jeffrey Markowitz, Anne Churchland, John Cunningham, et al. Behavenet:  
453 nonlinear embedding and bayesian neural decoding of behavioral videos. *Advances in Neural*  
454 *Information Processing Systems*, 2019.
- 455 [15] Liam Paninski and John P Cunningham. Neural data science: accelerating the experiment-  
456 analysis-theory cycle in large-scale neuroscience. *Current opinion in neurobiology*, 50:232–241,  
457 2018.
- 458 [16] Mark K Transtrum, Benjamin B Machta, Kevin S Brown, Bryan C Daniels, Christopher R  
459 Myers, and James P Sethna. Perspective: Slowness and emergent theories in physics, biology,  
460 and beyond. *The Journal of chemical physics*, 143(1):07B201\_1, 2015.
- 461 [17] Danilo Jimenez Rezende and Shakir Mohamed. Variational inference with normalizing flows.  
462 *International Conference on Machine Learning*, 2015.
- 463 [18] Laurent Dinh, Jascha Sohl-Dickstein, and Samy Bengio. Density estimation using real nvp.  
464 *arXiv preprint arXiv:1605.08803*, 2016.
- 465 [19] George Papamakarios, Theo Pavlakou, and Iain Murray. Masked autoregressive flow for density  
466 estimation. In *Advances in Neural Information Processing Systems*, pages 2338–2347, 2017.

- 467 [20] Gabriel Loaiza-Ganem, Yuanjun Gao, and John P Cunningham. Maximum entropy flow  
468 networks. *International Conference on Learning Representations*, 2017.
- 469 [21] Dustin Tran, Rajesh Ranganath, and David Blei. Hierarchical implicit models and likelihood-  
470 free variational inference. In *Advances in Neural Information Processing Systems*, pages 5523–  
471 5533, 2017.
- 472 [22] Mark S Goldman, Jorge Golowasch, Eve Marder, and LF Abbott. Global structure, robustness,  
473 and modulation of neuronal models. *Journal of Neuroscience*, 21(14):5229–5238, 2001.
- 474 [23] Gabrielle J Gutierrez, Timothy O’Leary, and Eve Marder. Multiple mechanisms switch an  
475 electrically coupled, synaptically inhibited neuron between competing rhythmic oscillators.  
476 *Neuron*, 77(5):845–858, 2013.
- 477 [24] Ashok Litwin-Kumar, Robert Rosenbaum, and Brent Doiron. Inhibitory stabilization and vi-  
478 sual coding in cortical circuits with multiple interneuron subtypes. *Journal of neurophysiology*,  
479 115(3):1399–1409, 2016.
- 480 [25] Chunyu A Duan, Marino Pagan, Alex T Piet, Charles D Kopec, Athena Akrami, Alexander J  
481 Riordan, Jeffrey C Erlich, and Carlos D Brody. Collicular circuits for flexible sensorimotor  
482 routing. *bioRxiv*, page 245613, 2018.
- 483 [26] Francesca Mastrogiuseppe and Srdjan Ostojic. Linking connectivity, dynamics, and computa-  
484 tions in low-rank recurrent neural networks. *Neuron*, 99(3):609–623, 2018.
- 485 [27] Sean R Bittner, Agostina Palmigiano, Kenneth D Miller, and John P Cunningham. Degener-  
486 ate solution networks for theoretical neuroscience. *Computational and Systems Neuroscience*  
487 *Meeting (COSYNE), Lisbon, Portugal*, 2019.
- 488 [28] Sean R Bittner, Alex T Piet, Chunyu A Duan, Agostina Palmigiano, Kenneth D Miller,  
489 Carlos D Brody, and John P Cunningham. Examining models in theoretical neuroscience with  
490 degenerate solution networks. *Bernstein Conference 2019, Berlin, Germany*, 2019.
- 491 [29] Marcel Nonnenmacher, Pedro J Goncalves, Giacomo Bassetto, Jan-Matthis Lueckmann, and  
492 Jakob H Macke. Robust statistical inference for simulation-based models in neuroscience. In  
493 *Bernstein Conference 2018, Berlin, Germany*, 2018.

- 494 [30] Deistler Michael, , Pedro J Goncalves, Kaan Ocal, and Jakob H Macke. Statistical inference for  
495 analyzing sloppiness in neuroscience models. In *Bernstein Conference 2019, Berlin, Germany*,  
496 2019.
- 497 [31] Jan-Matthis Lueckmann, Pedro J Goncalves, Giacomo Bassetto, Kaan Öcal, Marcel Nonnen-  
498 macher, and Jakob H Macke. Flexible statistical inference for mechanistic models of neural  
499 dynamics. In *Advances in Neural Information Processing Systems*, pages 1289–1299, 2017.
- 500 [32] Eve Marder and Vatsala Thirumalai. Cellular, synaptic and network effects of neuromodula-  
501 tion. *Neural Networks*, 15(4-6):479–493, 2002.
- 502 [33] Astrid A Prinz, Dirk Bucher, and Eve Marder. Similar network activity from disparate circuit  
503 parameters. *Nature neuroscience*, 7(12):1345, 2004.
- 504 [34] Edwin T Jaynes. Information theory and statistical mechanics. *Physical review*, 106(4):620,  
505 1957.
- 506 [35] Gamaleldin F Elsayed and John P Cunningham. Structure in neural population recordings:  
507 an expected byproduct of simpler phenomena? *Nature neuroscience*, 20(9):1310, 2017.
- 508 [36] Cristina Savin and Gašper Tkačik. Maximum entropy models as a tool for building precise  
509 neural controls. *Current opinion in neurobiology*, 46:120–126, 2017.
- 510 [37] Brendan K Murphy and Kenneth D Miller. Balanced amplification: a new mechanism of  
511 selective amplification of neural activity patterns. *Neuron*, 61(4):635–648, 2009.
- 512 [38] Hirofumi Ozeki, Ian M Finn, Evan S Schaffer, Kenneth D Miller, and David Ferster. Inhibitory  
513 stabilization of the cortical network underlies visual surround suppression. *Neuron*, 62(4):578–  
514 592, 2009.
- 515 [39] Daniel B Rubin, Stephen D Van Hooser, and Kenneth D Miller. The stabilized supralinear  
516 network: a unifying circuit motif underlying multi-input integration in sensory cortex. *Neuron*,  
517 85(2):402–417, 2015.
- 518 [40] Henry Markram, Maria Toledo-Rodriguez, Yun Wang, Anirudh Gupta, Gilad Silberberg, and  
519 Caizhi Wu. Interneurons of the neocortical inhibitory system. *Nature reviews neuroscience*,  
520 5(10):793, 2004.

- 521 [41] Bernardo Rudy, Gordon Fishell, SooHyun Lee, and Jens Hjerling-Leffler. Three groups of  
522 interneurons account for nearly 100% of neocortical gabaergic neurons. *Developmental neuro-*  
523 *biology*, 71(1):45–61, 2011.
- 524 [42] Robin Tremblay, Soohyun Lee, and Bernardo Rudy. GABAergic Interneurons in the Neocortex:  
525 From Cellular Properties to Circuits. *Neuron*, 91(2):260–292, 2016.
- 526 [43] Carsten K Pfeffer, Mingshan Xue, Miao He, Z Josh Huang, and Massimo Scanziani. Inhi-  
527 bition of inhibition in visual cortex: the logic of connections between molecularly distinct  
528 interneurons. *Nature Neuroscience*, 16(8):1068, 2013.
- 529 [44] Luis Carlos Garcia Del Molino, Guangyu Robert Yang, Jorge F. Mejias, and Xiao Jing Wang.  
530 Paradoxical response reversal of top- down modulation in cortical circuits with three interneu-  
531 ron types. *Elife*, 6:1–15, 2017.
- 532 [45] Guang Chen, Carl Van Vreeswijk, David Hansel, and David Hansel. Mechanisms underlying  
533 the response of mouse cortical networks to optogenetic manipulation. 2019.
- 534 [46] (2018) Allen Institute for Brain Science. Layer 4 model of v1. available from:  
535 <https://portal.brain-map.org/explore/models/14-mv1>.
- 536 [47] Yazan N Billeh, Binghuang Cai, Sergey L Gratiy, Kael Dai, Ramakrishnan Iyer, Nathan W  
537 Gouwens, Reza Abbasi-Asl, Xiaoxuan Jia, Joshua H Siegle, Shawn R Olsen, et al. Systematic  
538 integration of structural and functional data into multi-scale models of mouse primary visual  
539 cortex. *bioRxiv*, page 662189, 2019.
- 540 [48] Chunyu A Duan, Jeffrey C Erlich, and Carlos D Brody. Requirement of prefrontal and midbrain  
541 regions for rapid executive control of behavior in the rat. *Neuron*, 86(6):1491–1503, 2015.
- 542 [49] Omri Barak. Recurrent neural networks as versatile tools of neuroscience research. *Current*  
543 *opinion in neurobiology*, 46:1–6, 2017.
- 544 [50] David Sussillo and Omri Barak. Opening the black box: low-dimensional dynamics in high-  
545 dimensional recurrent neural networks. *Neural computation*, 25(3):626–649, 2013.
- 546 [51] Rodrigo Echeveste, Laurence Aitchison, Guillaume Hennequin, and Máté Lengyel. Cortical-like  
547 dynamics in recurrent circuits optimized for sampling-based probabilistic inference. *bioRxiv*,  
548 page 696088, 2019.



- 549 [52] Robert E Kass and Valérie Ventura. A spike-train probability model. *Neural computation*,  
550 13(8):1713–1720, 2001.
- 551 [53] Emery N Brown, Loren M Frank, Dengda Tang, Michael C Quirk, and Matthew A Wilson.  
552 A statistical paradigm for neural spike train decoding applied to position prediction from  
553 ensemble firing patterns of rat hippocampal place cells. *Journal of Neuroscience*, 18(18):7411–  
554 7425, 1998.
- 555 [54] Liam Paninski. Maximum likelihood estimation of cascade point-process neural encoding  
556 models. *Network: Computation in Neural Systems*, 15(4):243–262, 2004.
- 557 [55] M Yu Byron, John P Cunningham, Gopal Santhanam, Stephen I Ryu, Krishna V Shenoy, and  
558 Maneesh Sahani. Gaussian-process factor analysis for low-dimensional single-trial analysis  
559 of neural population activity. In *Advances in neural information processing systems*, pages  
560 1881–1888, 2009.
- 561 [56] Kenneth W Latimer, Jacob L Yates, Miriam LR Meister, Alexander C Huk, and Jonathan W  
562 Pillow. Single-trial spike trains in parietal cortex reveal discrete steps during decision-making.  
563 *Science*, 349(6244):184–187, 2015.
- 564 [57] Lea Duncker, Gergo Bohnert, Julien Boussard, and Maneesh Sahani. Learning interpretable  
565 continuous-time models of latent stochastic dynamical systems. *Proceedings of the 36th Inter-*  
566 *national Conference on Machine Learning*, 2019.
- 567 [58] Steven H Strogatz. Nonlinear dynamics and chaos: with applications to physics. *Biology,*  
568 *Chemistry, and Engineering (Studies in Nonlinearity)*, Perseus, Cambridge, UK, 1994.
- 569 [59] Rajesh Ranganath, Sean Gerrish, and David Blei. Black box variational inference. In *Artificial*  
570 *Intelligence and Statistics*, pages 814–822, 2014.
- 571 [60] Martin J Wainwright, Michael I Jordan, et al. Graphical models, exponential families, and  
572 variational inference. *Foundations and Trends® in Machine Learning*, 1(1–2):1–305, 2008.
- 573 [61] Laurent Dinh, Jascha Sohl-Dickstein, and Samy Bengio. Density estimation using real nvp.  
574 *Proceedings of the 5th International Conference on Learning Representations*, 2017.
- 575 [62] David M Blei, Alp Kucukelbir, and Jon D McAuliffe. Variational inference: A review for  
576 statisticians. *Journal of the American Statistical Association*, 112(518):859–877, 2017.

## 577 A Acknowledgements

578 This work was funded by NSF Graduate Research Fellowship, DGE-1644869, McKnight Endow-  
579 ment Fund, NIH NINDS 5R01NS100066, Simons Foundation 542963, NSF NeuroNex Award DBI-  
580 1707398, and The Gatsby Charitable Foundation. Helpful conversations were had with Francesca  
581 Mastrogiuseppe, Srdjan Ostojic, James Fitzgerald, Stephen Baccus, Dhruva Raman, Mehrdad  
582 Jazayeri, Liam Paninski, and Larry Abbott.

## 583 B Methods

### 584 B.1 Emergent property inference (EPI)

585 Emergent property inference (EPI) learns distributions of theoretical model parameters that pro-  
586 duce emergent properties of interest by combining ideas from maximum entropy flow networks  
587 (MEFNs) [20] and likelihood-free variational inference (LFVI) [21]. Consider model parameteri-  
588 zation  $z$  and data  $x$  which has an intractable likelihood  $p(x | z)$  defined by a model simulator of  
589 which samples are available  $x \sim p(x | z)$ . EPI optimizes a distribution  $q_\theta(z)$  (itself parameterized  
590 by  $\theta$ ) of model parameters  $z$  to produce an emergent property of interest  $\mathcal{B}$ ,

$$\mathcal{B} \triangleq \mathbb{E}_{z \sim q_\theta} [\mathbb{E}_{x \sim p(x|z)} [T(x)]] = \mu \quad (12)$$

591 Precisely, over the EPI distribution of parameters  $q_\theta(z)$  and distribution of simulated activity  
592  $p(x | z)$ , the emergent property statistics  $T(x)$  must equal the emergent property values  $\mu$  on  
593 average. This is a viable way to represent emergent properties in theoretical models, as we have  
594 demonstrated in the main text, and enables the EPI optimization.

595 With EPI, we use deep probability distributions to learn flexible approximations to model parameter  
596 distributions  $q_\theta(z)$ . In deep probability distributions, a simple random variable  $w \sim q_0(w)$  is  
597 mapped deterministically via a sequence of deep neural network layers ( $f_1, \dots, f_l$ ) parameterized by  
598 weights and biases  $\theta$  to the support of the distribution of interest:

$$z = f_\theta(\omega) = f_l(\dots f_1(\omega)) \quad (13)$$

599 Given a simulator defined by a theoretical model  $x \sim p(x | z)$  and some emergent property of  
600 interest  $\mathcal{B}$ ,  $q_\theta(z)$  is optimized via the neural network parameters  $\theta$  to find an optimally entropic

601 distribution  $q_\theta^*$  within the deep variational family  $\mathcal{Q}$  producing the emergent property:

$$q_\theta^*(z) = \operatorname{argmax}_{q_\theta \in \mathcal{Q}} H(q_\theta(z)) \quad (14)$$

$$\text{s.t. } \mathbb{E}_{z \sim q_\theta} [\mathbb{E}_{x \sim p(x|z)} [T(x)]] = \mu$$

602 Since we are optimizing parameters  $\theta$  of our deep probability distribution with respect to the entropy  
 603  $H(q_\theta(z))$ , we will need to take gradients with respect to the log probability density of samples from  
 604 the deep probability distribution.

$$H(q_\theta(z)) = \int -q_\theta(z) \log(q_\theta(z)) dz = \mathbb{E}_{z \sim q_\theta} [-\log(q_\theta(z))] = \mathbb{E}_{w \sim q_0} [-\log(q_\theta(f_\theta(w)))] \quad (15)$$

$$\nabla_\theta H(q_\theta(z)) = \mathbb{E}_{w \sim q_0} [-\nabla_\theta \log(q_\theta(f_\theta(w)))] \quad (16)$$

606 This optimization is done using the approach of MEFN [20], using architectures for deep proba-  
 607 bility distributions, called normalizing flows (see Section B.1.3), conferring a tractable calculation  
 608 of sample probability. In EPI, this methodology for learning maximum entropy distributions is  
 609 repurposed toward variational learning of model parameter distributions. Similar to LFVI [21], we  
 610 are motivated to do variational learning in models with intractable likelihood functions, in which  
 611 standard methods like stochastic gradient variational Bayes [6] or black box variational inference[59]  
 612 are not tractable. Furthermore, EPI focuses on setting mathematically defined emergent property  
 613 statistics to emergent property values of interest, whereas LFVI is focused on learning directly from  
 614 datasets. Optimizing this objective is a technological challenge, the details of which we elaborate  
 615 in Section B.1.2. Before going through those details, we ground this optimization in a toy example.

### 616 B.1.1 Example: 2D LDS

617 To gain intuition for EPI, consider a two-dimensional linear dynamical system model

$$\tau \frac{dx}{dt} = Ax \quad (17)$$

618 with

$$A = \begin{bmatrix} a_1 & a_2 \\ a_3 & a_4 \end{bmatrix} \quad (18)$$

619 To do EPI with the dynamics matrix elements as the free parameters  $z = [a_1 \ a_2 \ a_3 \ a_4]$  (fixing  
 620  $\tau = 1$ ), the emergent property statistics  $T(x)$  were chosen to contain the first- and second-moments  
 621 of the oscillatory frequency  $\omega$  and the growth/decay factor  $d$  of the oscillating system. To learn the  
 622 distribution of real entries of  $A$  that yield a distribution of  $d$  with mean zero with variance  $0.25^2$ ,

623 and oscillation frequency  $\omega$  with mean 1 Hz with variance  $(0.1\text{Hz})^2$ , we selected the real part of  
 624 the eigenvalue  $\text{real}(\lambda_1) = d$  and imaginary component of  $\text{imag}(\lambda_1) = 2\pi\omega$  as the emergent property  
 625 statistics.  $\lambda_1$  is the eigenvalue of greatest real part when there is zero imaginary component, and  
 626 alternatively of positive imaginary component, when the eigenvalues are complex conjugate pairs.  
 627 Those emergent property statistics were then constrained to

$$\mu = \mathbb{E} \begin{bmatrix} \text{real}(\lambda_1) \\ \text{imag}(\lambda_1) \\ (\text{real}(\lambda_1) - 0)^2 \\ (\text{imag}(\lambda_1) - 2\pi\omega)^2 \end{bmatrix} = \begin{bmatrix} 0.0 \\ 2\pi\omega \\ 0.25^2 \\ (2\pi 0.1)^2 \end{bmatrix} \quad (19)$$

628 where  $\omega = 1\text{Hz}$ . Unlike the models we presented in the main text, which calculate  $\mathbb{E}_{x \sim p(x|z)} [T(x)]$   
 629 via forward simulation, we have a closed form for  $\lambda_1$  of the dynamics matrix. The eigenvalues can  
 630 be calculated using the quadratic formula:

$$\lambda = \frac{\left(\frac{a_1+a_4}{\tau}\right) \pm \sqrt{\left(\frac{a_1+a_4}{\tau}\right)^2 + 4\left(\frac{a_2a_3-a_1a_4}{\tau}\right)}}{2} \quad (20)$$

631 where  $\lambda_1$  is the eigenvalue of  $\frac{1}{\tau}A$  with greatest real part.

632 Importantly, even though  $\mathbb{E}_{x \sim p(x|z)} [T(x)]$  is calculable directly via a closed form function and does  
 633 not require simulation, we cannot derive the distribution  $q_\theta^*$  directly. This is due to the formally hard  
 634 problem of the backward mapping: finding the natural parameters  $\eta$  from the mean parameters  
 635  $\mu$  of an exponential family distribution [60]. Instead, we can use EPI to learn the linear system  
 636 parameters producing such a band of oscillations (Fig. S1B).

637 Even this relatively simple system has nontrivial (though intuitively sensible) structure in the  
 638 parameter distribution. To validate our method (further than that of the underlying technology on  
 639 a ground truth solution [20]) we analytically derived the contours of the probability density from the  
 640 emergent property statistics and values (Fig. S2). In the  $a_1 - a_4$  plane, the black line at  $\text{real}(\lambda_1) =$   
 641  $\frac{a_1+a_4}{2} = 0$ , and the dotted black line at the standard deviation  $\text{real}(\lambda_1) = \frac{a_1+a_4}{2} \pm 0.25$ , and the grey  
 642 line at twice the standard deviation  $\text{real}(\lambda_1) = \frac{a_1+a_4}{2} \pm 0.5$  follow the contour of probability density  
 643 of the samples. (Fig. 2A). The distribution precisely reflects the desired statistical constraints and  
 644 model degeneracy in the sum of  $a_1$  and  $a_4$ . Intuitively, the parameters equivalent with respect to  
 645 emergent property statistic  $\text{real}(\lambda_1)$  have similar log densities.

646 To explain the structure in the bimodality of the EPI distribution, we examined the imaginary

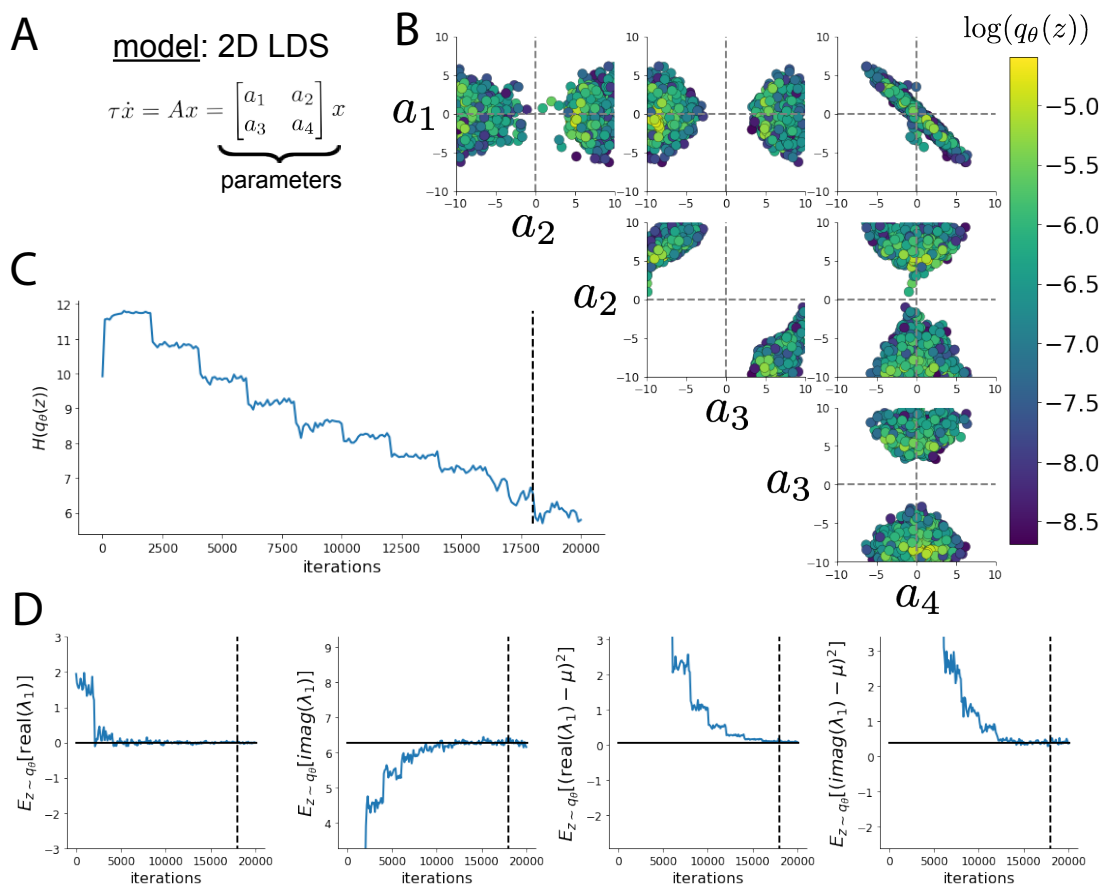

Fig. S1: A. Two-dimensional linear dynamical system model, where real entries of the dynamics matrix  $A$  are the parameters. B. The DSN distribution for a two-dimensional linear dynamical system with  $\tau = 1$  that produces an average of 1Hz oscillations with some small amount of variance. C. Entropy throughout the optimization. At the beginning of each augmented Lagrangian epoch (5,000 iterations), the entropy dipped due to the shifted optimization manifold where emergent property constraint satisfaction is increasingly weighted. D. Emergent property moments throughout optimization. At the beginning of each augmented Lagrangian epoch, the emergent property moments move closer to their constraints.

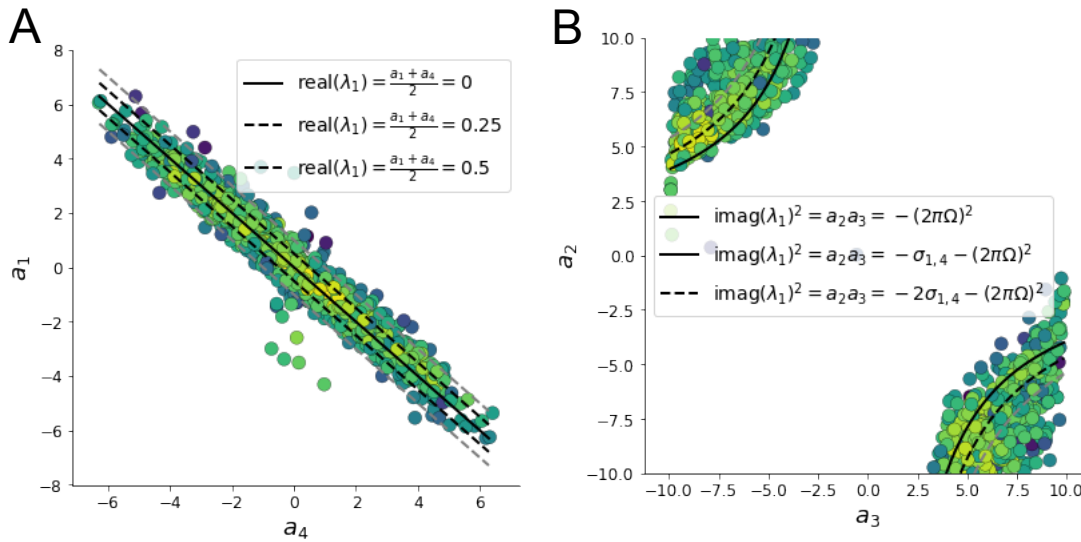

Fig. S2: A. Probability contours in the  $a_1 - a_4$  plane can be derived from the relationship to emergent property statistic of growth/decay factor. B. Probability contours in the  $a_2 - a_3$  plane can be derived from relationship to the emergent property statistic of oscillation frequency.

647 component of  $\lambda_1$ . When  $\text{real}(\lambda_1) = \frac{a_1 + a_4}{2} = 0$ , we have

$$\text{imag}(\lambda_1) = \begin{cases} \sqrt{\frac{a_1 a_4 - a_2 a_3}{\tau}}, & \text{if } a_1 a_4 < a_2 a_3 \\ 0 & \text{otherwise} \end{cases} \quad (21)$$

648 When  $\tau = 1$  and  $a_1 a_4 > a_2 a_3$  (center of distribution above), we have the following equation for the  
649 other two dimensions:

$$\text{imag}(\lambda_1)^2 = a_1 a_4 - a_2 a_3 \quad (22)$$

650 Since we constrained  $\mathbb{E}_{z \sim q_\theta} [\text{imag}(\lambda)] = 2\pi$  (with  $\omega = 1$ ), we can plot contours of the equation  
651  $\text{imag}(\lambda_1)^2 = a_1 a_4 - a_2 a_3 = (2\pi)^2$  for various  $a_1 a_4$  (Fig. S2A). If  $\sigma_{1,4} = \mathbb{E}_{z \sim q_\theta} (|a_1 a_4 - E_{q_\theta}[a_1 a_4]|)$ ,  
652 then we plot the contours as  $a_1 a_4 = 0$  (black),  $a_1 a_4 = -\sigma_{1,4}$  (black dotted), and  $a_1 a_4 = -2\sigma_{1,4}$   
653 (grey dotted) (Fig. S2B). This validates the curved structure of the inferred distribution learned  
654 through EPI. We take steps in negative standard deviation of  $a_1 a_4$  (dotted and gray lines), since  
655 there are few positive values  $a_1 a_4$  in the learned distribution. Subtler model-emergent property  
656 combinations will have even more complexity, further motivating the use of EPI for understanding  
657 these systems. As we expect, the distribution results in samples of two-dimensional linear systems  
658 oscillating near 1Hz (Fig. S3).

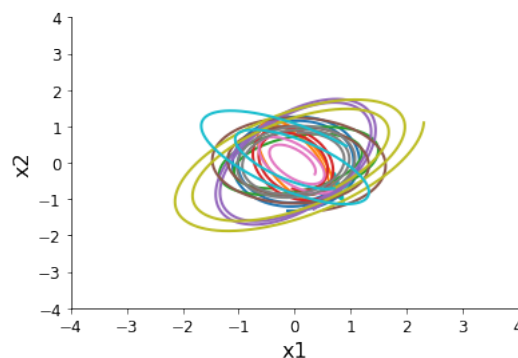

Fig. S3: Sampled dynamical system trajectories from the EPI distribution. Each trajectory is initialized at  $x(0) = \begin{bmatrix} \frac{\sqrt{2}}{2} & -\frac{\sqrt{2}}{2} \end{bmatrix}$ .

### 659 B.1.2 Augmented Lagrangian optimization

660 To optimize  $q_\theta(z)$  in Equation 14, the constrained optimization is performed using the augmented  
 661 Lagrangian method. The following objective is minimized:

$$L(\theta; \eta, c) = -H(q_\theta) + \eta^\top R(\theta) + \frac{c}{2} \|R(\theta)\|^2 \quad (23)$$

662 where  $R(\theta) = \mathbb{E}_{z \sim q_\theta} [\mathbb{E}_{x \sim p(x|z)} [T(x) - \mu]]$ ,  $\eta \in \mathbb{R}^m$  are the Lagrange multipliers (which are closely  
 663 related to the natural parameters of exponential families (see Section B.1.4)) and  $c$  is the penalty  
 664 coefficient. For a fixed  $(\eta, c)$ ,  $\theta$  is optimized with stochastic gradient descent. A low value of  
 665  $c$  is used initially, and increased during each augmented Lagrangian epoch, which is a period of  
 666 optimization with fixed  $\eta$  and  $c$  for a given number of stochastic optimization iterations. Similarly,  
 667  $\eta$  is tuned each epoch based on the constraint violations. For the linear two-dimensional system  
 668 (Fig. S1C), optimization hyperparameters are initialized to  $c_1 = 10^{-4}$  and  $\eta_1 = \mathbf{0}$ . The penalty  
 669 coefficient is updated based on the result of a hypothesis test regarding the reduction in constraint  
 670 violation. The p-value of  $E[\|R(\theta_{k+1})\|] > \gamma E[\|R(\theta_k)\|]$  is computed, and  $c_{k+1}$  is updated to  $\beta c_k$   
 671 with probability  $1 - p$ . Throughout the study,  $\beta = 4.0$  and  $\gamma = 0.25$  were used. The other update  
 672 rule is  $\eta_{k+1} = \eta_k + c_k \frac{1}{n} \sum_{i=1}^n (T(x^{(i)}) - \mu)$ . In this example, each augmented Lagrangian epoch ran  
 673 for 2,000 iterations. We consider the optimization to have converged when a null hypothesis test of  
 674 constraint violations being zero is accepted for all constraints at a significance threshold 0.05. This  
 675 is the dotted line on the plots below depicting the optimization cutoff of EPI for the 2-dimensional  
 676 linear system.

677 The intention is that  $c$  and  $\eta$  start at values encouraging entropic growth early in optimization.

678 Then, as they increase in magnitude with each training epoch, the constraint satisfaction terms  
 679 are increasingly weighted, resulting in a decrease in entropy. If the optimization is left to continue  
 680 running, and structural pathologies in the distribution may be introduced.

### 681 B.1.3 Normalizing flows

682 Deep probability models typically consist of several layers of fully connected neural networks.  
 683 When each neural network layer is restricted to be a bijective function, the sample density can be  
 684 calculated using the change of variables formula at each layer of the network. For  $z' = f(z)$ ,

$$q(z') = q(f^{-1}(z')) \left| \det \frac{\partial f^{-1}(z')}{\partial z'} \right| = q(z) \left| \det \frac{\partial f(z)}{\partial z} \right|^{-1} \quad (24)$$

685 However, this computation has cubic complexity in dimensionality for fully connected layers. By  
 686 restricting our layers to normalizing flows [17] – bijective functions with fast log determinant Ja-  
 687 cobian computations, we can tractably optimize deep generative models with objectives that are a  
 688 function of sample density, like entropy. Most of our analyses use real NVP [61], which have proven  
 689 effective in our architecture searches, and have the advantageous features of fast sampling and fast  
 690 probability density evaluation.

### 691 B.1.4 Emergent property inference as variational inference in an exponential family

692 Consider the goal of doing variational inference with an exponential family posterior distribution  
 693  $p(z | x)$ . We use the following abbreviated notation to collect the base measure  $b(z)$  and sufficient  
 694 statistics  $T(z)$  into  $\tilde{T}(z)$  and likewise concatenate a 1 onto the end of the natural parameter  $\tilde{\eta}(x)$ .  
 695 The log normalizing constant  $A(\eta(x))$  remains unchanged.

$$\begin{aligned} p(z | x) &= b(z) \exp \left( \eta(x)^\top T(z) - A(\eta(x)) \right) = \exp \left( \begin{bmatrix} \eta(x) \\ 1 \end{bmatrix}^\top \begin{bmatrix} T(z) \\ b(z) \end{bmatrix} - A(\eta(x)) \right) \\ &= \exp \left( \tilde{\eta}(x)^\top \tilde{T}(z) - A(\eta(x)) \right) \end{aligned} \quad (25)$$

696 Variational inference with an exponential family posterior distribution uses optimization to mini-  
 697 mize the following divergence [62]:

$$q_\theta^* = \operatorname{argmin}_{q_\theta \in Q} KL(q_\theta || p(z | x)) \quad (26)$$



698  $q_\theta(z)$  is the variational approximation to the posterior with variational parameters  $\theta$ . We can write  
 699 this KL divergence in terms of entropy of the variational approximation.

$$KL(q_\theta || p(z | x)) = \mathbb{E}_{z \sim q_\theta} [\log(q_\theta(z))] - \mathbb{E}_{z \sim q_\theta} [\log(p(z | x))] \quad (27)$$

700

$$= -H(q_\theta) - \mathbb{E}_{z \sim q_\theta} \left[ \tilde{\eta}(x)^\top \tilde{T}(z) - A(\eta(x)) \right] \quad (28)$$

701 As far as the variational optimization is concerned, the log normalizing constant is independent of  
 702  $q_\theta(z)$ , so it can be dropped.

$$\operatorname{argmin}_{q_\theta \in Q} KL(q_\theta || p(z | x)) = \operatorname{argmin}_{q_\theta \in Q} -H(q_\theta) - \mathbb{E}_{z \sim q_\theta} \left[ \tilde{\eta}(x)^\top \tilde{T}(z) \right] \quad (29)$$

703 Further, we can write the objective in terms of the first moment of the sufficient statistics  $\mu =$   
 704  $\mathbb{E}_{z \sim p(z|x)} [T(z)]$ .

$$= \operatorname{argmin}_{q_\theta \in Q} -H(q_\theta) - \mathbb{E}_{z \sim q_\theta} \left[ \tilde{\eta}(x)^\top \left( \tilde{T}(z) - \mu \right) \right] + \tilde{\eta}(x)^\top \mu \quad (30)$$

705

$$= \operatorname{argmin}_{q_\theta \in Q} -H(q_\theta) - \mathbb{E}_{z \sim q_\theta} \left[ \tilde{\eta}(x)^\top \left( \tilde{T}(z) - \mu \right) \right] \quad (31)$$

706 In comparison, in emergent property inference (EPI), we're solving the following problem.

$$q_\theta^*(z) = \operatorname{argmax}_{q_\theta \in Q} H(q_\theta(z)), \text{ s.t. } \mathbb{E}_{z \sim q_\theta} \left[ \mathbb{E}_{x \sim p(x|z)} [T(x)] \right] = \mu \quad (32)$$

707 The Lagrangian objective (without the augmentation) is

$$q_\theta^* = \operatorname{argmin}_{q_\theta \in Q} -H(q_\theta) + \eta_{\text{opt}}^\top \left( \mathbb{E}_{z \sim q_\theta} \left[ \tilde{T}(z) \right] - \mu \right) \quad (33)$$

708 As the optimization proceeds,  $\eta_{\text{opt}}^\top$  should converge to the natural parameter  $\tilde{\eta}(x)$  through its  
 709 adaptations in each epoch (see Section B.1.2).

710 The derivation of the natural parameter  $\tilde{\eta}(x)$  of an exponential family distribution from its mean  
 711 parameter  $\mu$  is referred to as the backward mapping and is formally hard to identify [60]. Since  
 712 this backward mapping is deterministic, we can replace the notation of  $p(z | x)$  with  $p(z | \mathcal{B})$   
 713 conceptualizing an inferred distribution that obeys emergent property  $\mathcal{B}$  (see Section B.1).

## 714 B.2 Theoretical models

715 In this study, we used emergent property inference to examine several models relevant to theoretical  
 716 neuroscience. Here, we provide the details of each model and the related analyses.

## 717 B.2.1 Stomatogastric ganglion

718 We analyze how the parameters  $z = [g_{el} \ g_{synA}]$  govern the emergent phenomena of network  
 719 syncing in a model of the stomatogastric ganglion (STG) shown in Figure 1A with activity  $x =$   
 720  $[x_{f1}, x_{f2}, x_{hub}, x_{s1}, x_{s2}]$ . Each neuron's membrane potential  $x_\alpha(t)$  for  $\alpha \in \{f1, f2, hub, s1, s2\}$  is the  
 721 solution of the following differential equation:

$$C_m \frac{dx_\alpha}{dt} = - [h_{leak}(x; z) + h_{Ca}(x; z) + h_K(x; z) + h_{hyp}(x; z) + h_{elec}(x; z) + h_{syn}(x; z)] \quad (34)$$

722 The membrane potential of each neuron is affected by the leak, calcium, potassium, hyperpolariza-  
 723 tion, electrical and synaptic currents, respectively, which are functions of all membrane potentials  
 724 and the conductance parameters  $z$ . The capacitance of the cell membrane was set to  $C_m = 1nF$ .  
 725 Specifically, the currents are the difference in the neuron's membrane potential and that current  
 726 type's reversal potential multiplied by a conductance:

$$h_{leak}(x; z) = g_{leak}(x_\alpha - V_{leak}) \quad (35)$$

727

$$h_{elec}(x; z) = g_{el}(x_\alpha^{post} - x_\alpha^{pre}) \quad (36)$$

728

$$h_{syn}(x; z) = g_{syn} S_\infty^{pre}(x_\alpha^{post} - V_{syn}) \quad (37)$$

729

$$h_{Ca}(x; z) = g_{Ca} M_\infty(x_\alpha - V_{Ca}) \quad (38)$$

730

$$h_K(x; z) = g_K N(x_\alpha - V_K) \quad (39)$$

731

$$h_{hyp}(x; z) = g_h H(x_\alpha - V_{hyp}) \quad (40)$$

732 The reversal potentials were set to  $V_{leak} = -40mV$ ,  $V_{Ca} = 100mV$ ,  $V_K = -80mV$ ,  $V_{hyp} = -20mV$ ,  
 733 and  $V_{syn} = -75mV$ . The other conductance parameters were fixed to  $g_{leak} = 1 \times 10^{-4} \mu S$ .  $g_{Ca}$ ,  
 734  $g_K$ , and  $g_{hyp}$  had different values based on fast, intermediate (hub) or slow neuron. Fast:  $g_{Ca} =$   
 735  $1.9 \times 10^{-2}$ ,  $g_K = 3.9 \times 10^{-2}$ , and  $g_{hyp} = 2.5 \times 10^{-2}$ . Intermediate:  $g_{Ca} = 1.7 \times 10^{-2}$ ,  $g_K = 1.9 \times 10^{-2}$ ,  
 736 and  $g_{hyp} = 8.0 \times 10^{-3}$ . Intermediate:  $g_{Ca} = 8.5 \times 10^{-3}$ ,  $g_K = 1.5 \times 10^{-2}$ , and  $g_{hyp} = 1.0 \times 10^{-2}$ .

737 Furthermore, the Calcium, Potassium, and hyperpolarization channels have time-dependent gating  
 738 dynamics dependent on steady-state gating variables  $M_\infty$ ,  $N_\infty$  and  $H_\infty$ , respectively.

$$M_\infty = 0.5 \left( 1 + \tanh \left( \frac{x_\alpha - v_1}{v_2} \right) \right) \quad (41)$$

739

$$\frac{dN}{dt} = \lambda_N (N_\infty - N) \quad (42)$$

740

$$N_\infty = 0.5 \left( 1 + \tanh \left( \frac{x_\alpha - v_3}{v_4} \right) \right) \quad (43)$$

741

$$\lambda_N = \phi_N \cosh\left(\frac{x_\alpha - v_3}{2v_4}\right) \quad (44)$$

742

$$\frac{dH}{dt} = \frac{(H_\infty - H)}{\tau_h} \quad (45)$$

743

$$H_\infty = \frac{1}{1 + \exp\left(\frac{x_\alpha + v_5}{v_6}\right)} \quad (46)$$

744

$$\tau_h = 272 - \left(\frac{-1499}{1 + \exp\left(\frac{-x_\alpha + v_7}{v_8}\right)}\right) \quad (47)$$

745 where we set  $v_1 = 0mV$ ,  $v_2 = 20mV$ ,  $v_3 = 0mV$ ,  $v_4 = 15mV$ ,  $v_5 = 78.3mV$ ,  $v_6 = 10.5mV$ ,  
 746  $v_7 = -42.2mV$ ,  $v_8 = 87.3mV$ ,  $v_9 = 5mV$ , and  $v_{th} = -25mV$ . These are the same parameter  
 747 values used in [23].

748 Finally, there is a synaptic gating variable as well:

$$S_\infty = \frac{1}{1 + \exp\left(\frac{v_{th} - x_\alpha}{v_9}\right)} \quad (48)$$

749 When the dynamic gating variables are considered, this is actually a 15-dimensional nonlinear  
 750 dynamical system.

751 In order to measure the frequency of the hub neuron during EPI, the STG model was simulated  
 752 for  $T = 500$  time steps of  $dt = 25ms$ . In EPI, since gradients are taken through the simulation  
 753 process, the number of time steps are kept modest if possible. The chosen  $dt$  and  $T$  were the  
 754 most computationally convenient choices yielding accurate frequency measurement. Poor resolution  
 755 afforded by the discrete Fourier transform motivated the use of an alternative basis of complex  
 756 exponentials to measure spiking frequency. Instead, we used a basis of complex exponentials with  
 757 frequencies from 0.0-1.0 Hz at 0.01Hz resolution,  $\Phi = [0.0, 0.01, \dots, 1.0]^T$

758 Another consideration was that the frequency spectra of the neuron membrane potentials had sev-  
 759 eral peaks. High-frequency sub-threshold activity obscured the maximum frequency measurement  
 760 in the complex exponential basis. Accordingly, subthreshold activity was set to zero, and the  
 761 whole signal was low-pass filtered with a moving average window of length 20. The signal was  
 762 subsequently mean centered. After this pre-processing, the maximum frequency in the filter bank  
 763 accurately reflected the firing frequency.

764 Finally, to differentiate through the maximum frequency identification, we used a sum-of-powers  
 765 normalization. Let  $\mathcal{X}_\alpha \in \mathcal{C}^{|\Phi|}$  be the complex exponential filter bank dot products with the signal

766  $x_\alpha \in \mathbb{R}^N$ , where  $\alpha \in \{\text{f1, f2, hub, s1, s2}\}$ . The “frequency identification” vector is

$$v_\alpha = \frac{|\mathcal{X}_\alpha|^\beta}{\sum_{k=1}^N |\mathcal{X}_\alpha(k)|^\beta} \quad (49)$$

767 The frequency is then calculated as  $\omega_\alpha = v_\alpha^\top \Phi$  with  $\beta = 100$ .

768 Network syncing, like all other emergent properties in this work, are defined by the emergent  
 769 property statistics and values. The emergent property statistics are the first- and second-moments  
 770 of the firing frequencies. The first moments are set to 0.542Hz, while the second moments are set  
 771 to 0.025Hz<sup>2</sup>.

$$E \begin{bmatrix} \omega_{\text{f1}} \\ \omega_{\text{f2}} \\ \omega_{\text{hub}} \\ \omega_{\text{s1}} \\ \omega_{\text{s2}} \\ (\omega_{\text{f1}} - 0.542)^2 \\ (\omega_{\text{f2}} - 0.542)^2 \\ (\omega_{\text{hub}} - 0.542)^2 \\ (\omega_{\text{s1}} - 0.542)^2 \\ (\omega_{\text{s2}} - 0.542)^2 \end{bmatrix} = \begin{bmatrix} 0.542 \\ 0.542 \\ 0.542 \\ 0.542 \\ 0.542 \\ 0.025^2 \\ 0.025^2 \\ 0.025^2 \\ 0.025^2 \\ 0.025^2 \end{bmatrix} \quad (50)$$

772 For EPI in Fig 2C, we used a real NVP architecture with two coupling layers. Each coupling layer  
 773 had two hidden layers of 10 units each, and we mapped onto a support of  $z \in \left[ \begin{bmatrix} 0 \\ 0 \end{bmatrix}, \begin{bmatrix} 10 \\ 8 \end{bmatrix} \right]$  (the  
 774 same considered in [23]). We have shown the EPI optimization that converged with maximum  
 775 entropy across 5 random seeds and augmented Lagrangian coefficient initializations of  $c_0 \in \{10\}$ .

776 We calculated the Hessian at the mode of the inferred EPI distribution. The Hessian of a proba-  
 777 bility model is the second order gradient of the log probability density  $\log q_\theta(z)$  with respect to the  
 778 parameters  $z$ :  $\frac{\partial^2 \log q_\theta(z)}{\partial z \partial z^\top}$ . With EPI, we can examine the Hessian, which is analytically available  
 779 throughout the deep probability distribution, at a given parameter choice to determine what di-  
 780 mensions of parameter space are sensitive (high magnitude eigenvalue), and which are degenerate  
 781 (low magnitude eigenvalue) with respect to the emergent property produced. In Figure 1B, the  
 782 eigenvectors of the Hessian  $v_1$  and  $v_2$  are shown evaluated at the mode of the distribution. The  
 783 length of the arrows is inversely proportional to the square root of absolute value of their eigen-  
 784 values  $\lambda_1 = -147.2$  and  $\lambda_2 = -19.70$ . We quantitatively measured the sensitivity of the model  
 785 with respect to network syncing along the eigenvectors of the Hessian (Fig. 1B, inset). Sensitivity

786 was measured as the slope coefficient of linear regression fit to network syncing error (the sum of  
 787 squared differences of each neuron’s frequency from 0.542Hz) as a function of perturbation mag-  
 788 nitude (from 0 to 0.4) away from the mode along both orientations indicated by the eigenvector.  
 789 These sensitivities were compared to all other dimensions of parameter space, revealing that the  
 790 Hessian eigenvectors indeed identified the directions of greatest sensitivity and degeneracy.

### 791 B.2.2 Primary visual cortex

792 The dynamics of each neural populations average rate  $x = [x_E \ x_P \ x_S \ x_V]^\top$  are given by:

$$\tau \frac{dx}{dt} = -x + [Wx + h]_+^n \quad (51)$$

793 Some neuron-types largely lack synaptic projections to other neuron-types [43], and it is popular  
 794 to only consider a subset of the effective connectivities [24, 44, 45].

$$W = \begin{bmatrix} W_{EE} & W_{EP} & W_{ES} & 0 \\ W_{PE} & W_{PP} & W_{PS} & 0 \\ W_{SE} & 0 & 0 & W_{SV} \\ W_{VE} & W_{VP} & W_{VS} & 0 \end{bmatrix} \quad (52)$$

795 By consolidating information from many experimental datasets, Billeh et al. [47] produce estimates  
 796 of the synaptic strength (in mV)

$$M = \begin{bmatrix} 0.36 & 0.48 & 0.31 & 0.28 \\ 1.49 & 0.68 & 0.50 & 0.18 \\ 0.86 & 0.42 & 0.15 & 0.32 \\ 1.31 & 0.41 & 0.52 & 0.37 \end{bmatrix} \quad (53)$$

797 and connection probability

$$C = \begin{bmatrix} 0.16 & 0.411 & 0.424 & 0.087 \\ 0.395 & .451 & 0.857 & 0.02 \\ 0.182 & 0.03 & 0.082 & 0.625 \\ 0.105 & 0.22 & 0.77 & 0.028 \end{bmatrix} \quad (54)$$

798 Multiplying these connection probabilities and synaptic efficacies gives us an effective connectivity

799 matrix:

$$W_{\text{full}} = C \odot M = \begin{bmatrix} 0.16 & 0.411 & 0.424 & 0.087 \\ 0.395 & .451 & 0.857 & 0.02 \\ 0.182 & 0.03 & 0.082 & 0.625 \\ 0.105 & 0.22 & 0.77 & 0.028 \end{bmatrix} \quad (55)$$

800 We used the entries of this full effective connectivity matrix that are not considered to be ineffectual  
801 (Equation 52).

802 We look at how this four-dimensional nonlinear dynamical model of V1 responds to different inputs,  
803 and compare the predictions of the linear response to the approximate posteriors obtained through  
804 EPI. The input to the system is the sum of a baseline input  $b = [1 \ 1 \ 1 \ 1]^\top$  and a differential  
805 input  $dh$ :

$$h = b + dh \quad (56)$$

806 All simulations of this system had  $T = 100$  time points, a time step  $dt = 5\text{ms}$ , and time constant  
807  $\tau = 20\text{ms}$ . And the system was initialized to a random draw  $x(0)_i \sim \mathcal{N}(1, 0.01)$ .

808 We can describe the dynamics of this system more generally by

$$\dot{x}_i = -x_i + f(u_i) \quad (57)$$

809 where the input to each neuron is

$$u_i = \sum_j W_{ij}x_j + h_i \quad (58)$$

810 Let  $F_{ij} = \gamma_i \delta(i, j)$ , where  $\gamma_i = f'(u_i)$ . Then, the linear response is

$$\frac{dx_{ss}}{dh} = F(W \frac{dx_{ss}}{dh} + I) \quad (59)$$

811 which is calculable by

$$\frac{dx_{ss}}{dh} = (F^{-1} - W)^{-1} \quad (60)$$

812 This calculation is used to produce the magenta lines in Figure 2C, which show the linearly predicted  
813 inputs that generate a response from two standard deviations (of  $\mathcal{B}$ ) below and above  $y$ .

814 The emergent property we considered was the first and second moments of the change in steady  
815 state rate  $dx_{ss}$  between the baseline input  $h = b$  and  $h = b + dh$ . We use the following notation to  
816 indicate that the emergent property statistics were set to the following values:

$$\mathcal{B}(\alpha, y) \triangleq \mathbb{E} \begin{bmatrix} dx_{\alpha,ss} \\ (dx_{\alpha,ss} - y)^2 \end{bmatrix} = \begin{bmatrix} y \\ 0.01^2 \end{bmatrix} \quad (61)$$

817 In the final analysis for this model, we sweep the input one neuron at a time away from the mode  
 818 of each inferred distributions  $dh^* = z^* = \operatorname{argmax}_z \log q_\theta(z | \mathcal{B}(\alpha, 0.1))$ . The differential responses  
 819  $\delta x_{\alpha,ss}$  are examined at perturbed inputs  $h = b + dh^* + \delta h_\alpha \hat{u}_\alpha$  where  $\hat{u}_\alpha$  is a unit vector in the  
 820 dimension of  $\alpha$  and  $\delta h_\alpha \in [-15, 15]$ .

821 For each  $\mathcal{B}(\alpha, y)$  with  $\alpha \in \{E, P, S, V\}$  and  $y \in \{0.1, 0.5\}$ , we ran EPI with five different random  
 822 initial seeds using an architecture of four coupling layers, each with two hidden layers of 10 units.  
 823 We set  $c_0 = 10^5$ . The support of the learned distribution was restricted to  $z_i \in [-5, 5]$ .

### 824 B.2.3 Superior colliculus

825 In the model of Duan et al [25], there are four total units: two in each hemisphere corresponding to  
 826 the Pro/Contra and Anti/Ipsi populations. They are denoted as left Pro (LP), left Anti (LA), right  
 827 Pro (RP) and right Anti (RA). Each unit has an activity ( $x_\alpha$ ) and internal variable ( $u_\alpha$ ) related  
 828 by

$$x_\alpha(t) = \left( \frac{1}{2} \tanh \left( \frac{u_\alpha(t) - \epsilon}{\zeta} \right) + \frac{1}{2} \right) \quad (62)$$

829 where  $\alpha \in \{LP, LA, RA, RP\}$   $\epsilon = 0.05$  and  $\zeta = 0.5$  control the position and shape of the nonlin-  
 830 earity, respectively.

831 We order the elements of  $x$  and  $u$  in the following manner

$$x = \begin{bmatrix} x_{LP} \\ x_{LA} \\ x_{RP} \\ x_{RA} \end{bmatrix} \quad u = \begin{bmatrix} u_{LP} \\ u_{LA} \\ u_{RP} \\ u_{RA} \end{bmatrix} \quad (63)$$

832 The internal variables follow dynamics:

$$\tau \frac{du}{dt} = -u + Wx + h + \sigma dB \quad (64)$$

833 with time constant  $\tau = 0.09s$  and Gaussian noise  $\sigma dB$  controlled by the magnitude of  $\sigma = 1.0$ . The  
 834 weight matrix has 8 parameters  $sW_P, sW_A, vW_{PA}, vW_{AP}, hW_P, hW_A, dW_{PA},$  and  $dW_{AP}$  (Fig.  
 835 4B).

$$W = \begin{bmatrix} sW_P & vW_{PA} & hW_P & dW_{PA} \\ vW_{AP} & sW_A & dW_{AP} & hW_A \\ hW_P & dW_{PA} & sW_P & vW_{PA} \\ dW_{AP} & hW_A & vW_{AP} & sW_A \end{bmatrix} \quad (65)$$

836 The system receives five inputs throughout each trial, which has a total length of 1.8s.

$$h = h_{\text{rule}} + h_{\text{choice-period}} + h_{\text{light}} \quad (66)$$

837 There are rule-based inputs depending on the condition,

$$h_{P,\text{rule}}(t) = \begin{cases} I_{P,\text{rule}} \begin{bmatrix} 1 & 0 & 0 & 1 \end{bmatrix}^{\top}, & \text{if } t \leq 1.2s \\ 0, & \text{otherwise} \end{cases} \quad (67)$$

838

$$h_{A,\text{rule}}(t) = \begin{cases} I_{A,\text{rule}} \begin{bmatrix} 0 & 1 & 1 & 0 \end{bmatrix}^{\top}, & \text{if } t \leq 1.2s \\ 0, & \text{otherwise} \end{cases} \quad (68)$$

839 a choice-period input,

$$h_{\text{choice}}(t) = \begin{cases} I_{\text{choice}} \begin{bmatrix} 1 & 1 & 1 & 1 \end{bmatrix}^{\top}, & \text{if } t > 1.2s \\ 0, & \text{otherwise} \end{cases} \quad (69)$$

840 and an input to the right or left-side depending on where the light stimulus is delivered.

$$h_{\text{light}}(t) = \begin{cases} I_{\text{light}} \begin{bmatrix} 1 & 1 & 0 & 0 \end{bmatrix}^{\top}, & \text{if } t > 1.2s \text{ and Left} \\ I_{\text{light}} \begin{bmatrix} 0 & 0 & 1 & 1 \end{bmatrix}^{\top}, & \text{if } t > 1.2s \text{ and Right} \\ 0, & t \leq 1.2s \end{cases} \quad (70)$$

841 The input parameterization was fixed to  $I_{P,\text{rule}} = 10$ ,  $I_{A,\text{rule}} = 10$ ,  $I_{\text{choice}} = 2$ , and  $I_{\text{light}} = 1$

842 To produce a Bernoulli rate of  $p_{LP}$  in the Left, Pro condition, let  $\hat{p}_i$  be the empirical average steady  
843 state (ss) response (final  $x_{LP}$  at end of task) over  $M=500$  Gaussian noise draws for a given SC  
844 model parameterization  $z_i$ :

$$\hat{p}_i = \mathbb{E}_{\sigma dB} [x_{LP} | s = L, c = P, z = z_i] = \frac{1}{M} \sum_{j=1}^M x_{LP}(s = L, c = P, z = z_i, \sigma dB_j) \quad (71)$$

845 where from here on  $x_{\alpha}$  denotes the steady state activity at the end of the trial. For the first  
846 emergent property statistic, the average over EPI samples (from  $q_{\theta}(z)$ ) is set to the desired value  
847  $p_{LP}$ :

$$\mathbb{E}_{z_i \sim q_{\phi}} [\mathbb{E}_{\sigma dB} [x_{LP,ss} | s = L, c = P, z = z_i]] = \mathbb{E}_{z_i \sim q_{\phi}} [\hat{p}_i] = p_{LP} \quad (72)$$

848 For the next emergent property statistic, we ask that the variance of the steady state responses  
849 across Gaussian draws, is the Bernoulli variance for the empirical rate  $\hat{p}_i$ .

$$\mathbb{E}_{z \sim q_{\phi}} [\sigma_{err}^2] = 0 \quad (73)$$



850

$$\sigma_{err}^2 = Var_{\sigma dB} [x_{LP} | s = L, c = P, z = z_i] - \hat{p}_i(1 - \hat{p}_i) \quad (74)$$

851 We have an additional constraint that the Pro neuron on the opposite hemisphere should have the  
 852 opposite value (0 and 1). We can enforce this with a final constraint:

$$\mathbb{E}_{z \sim q\phi} [d_P] = \mathbb{E}_{\sigma dB} [(x_{LP} - x_{RP})^2 | s = L, c = P, z = z_i] = 1 \quad (75)$$

853 Since the maximum variance of a random variable bounded from 0 to 1 is the Bernoulli variance  
 854  $\hat{p}(1 - \hat{p})$ , and the maximum squared difference between two variables bounded from 0 to 1 is 1, we  
 855 do not need to control the second moment of these test statistics. In practice, these variables are  
 856 dynamical system states and can only exponentially decay (or saturate) to 0 (or 1), so the Bernoulli  
 857 variance error and squared difference constraints can only be undershot. This is important to be  
 858 mindful of when evaluating the convergence criteria. Instead of using our usual hypothesis testing  
 859 criteria for convergence to the emergent property, we set a slack variable threshold only for these  
 860 technically infeasible emergent property values to 0.05.

861 Training DSNs to learn distributions of dynamical system parameterizations that produce Bernoulli  
 862 responses at a given rate (with small variance around that rate) was harder to do than expected.  
 863 There is a pathology in this optimization setup, where the learned distribution of weights is bimodal  
 864 attributing a fraction  $p$  of the samples to an expansive mode (which always sends  $x_{LP}$  to 1), and a  
 865 fraction  $1 - p$  to a decaying mode (which always sends  $x_{LP}$  to 0). This pathology was avoided using  
 866 an inequality constraint prohibiting parameter samples that resulted in low variance of responses  
 867 across noise.

868 In total, the emergent property of rapid task switching at accuracy level  $p$  was defined as

$$\mathcal{B}(p) \triangleq \begin{bmatrix} \hat{p}_P \\ \hat{p}_A \\ (\hat{p}_P - p)^2 \\ (\hat{p}_A - p)^2 \\ \sigma_{P,err}^2 \\ \sigma_{A,err}^2 \\ d_P \\ d_A \end{bmatrix} = \begin{bmatrix} p \\ p \\ 0.15^2 \\ 0.15^2 \\ 0 \\ 0 \\ 1 \\ 1 \end{bmatrix} \quad (76)$$

869 For each accuracy level  $p$ , we ran EPI for 10 different random seeds and selected the maximum  
 870 entropy solution using an architecture of 10 planar flows with  $c_0 = 2$ . The support of  $z$  was  $\mathbb{R}^8$ .

#### 871 B.2.4 Rank-1 RNN

872 Recent work establishes a link between RNN connectivity weights and the resulting dynamical  
873 responses of the network, using dynamic mean field theory (DMFT) [26]. Specifically, DMFT  
874 describes the properties of activity in infinite-size neural networks given a distribution on the  
875 connectivity weights. In such a model, the connectivity of a rank-1 RNN (which was sufficient for  
876 the Gaussian posterior conditioning task), has weight matrix  $W$ , which is the sum of a random  
877 component with strength determined by  $g$  and a structured component determined by the outer  
878 product of vectors  $m$  and  $n$ :

$$W = g\chi + \frac{1}{N}mn^\top, \quad (77)$$

879 where  $\chi_{ij} \sim \mathcal{N}(0, \frac{1}{N})$ , and the entries of  $m$  and  $n$  are drawn from Gaussian distributions  $m_i \sim$   
880  $\mathcal{N}(M_m, 1)$  and  $n_i \sim \mathcal{N}(M_n, 1)$ . From such a parameterization, this theory produces consistency  
881 equations for the dynamic mean field variables in terms of parameters like  $g$ ,  $M_m$ , and  $M_n$ , which we  
882 study in Section 3.5. That is the dynamic mean field variables (e.g. the activity along a vector  $\kappa_v$ ,  
883 the total variance  $\Delta_0$ , structured variance  $\Delta_\infty$ , and the chaotic variance  $\Delta_T$ ) are written as functions  
884 of one another in terms of connectivity parameters. The values of these variables can be used  
885 obtained using a nonlinear system of equations solver. These dynamic mean field variables are then  
886 cast as task-relevant variables with respect to the context of the provided inputs. Mastrogiuseppe et  
887 al. designed low-rank RNN connectivities via minimalist connectivity parameters to solve canonical  
888 tasks from behavioral neuroscience.

889 We consider the DMFT equation solver as a black box that takes in a low-rank parameterization  
890  $z$  (e.g.  $z = \begin{bmatrix} g & M_m & M_n \end{bmatrix}$ ) and outputs the values of the dynamic mean field variables, of which  
891 we cast  $\kappa_r$  and  $\Delta_T$  as task-relevant variables  $\mu_{\text{post}}$  and  $\sigma_{\text{post}}^2$  in the Gaussian posterior conditioning  
892 toy example. Importantly, the solution produced by the solver is differentiable with respect to the  
893 input parameters, allowing us to use DMFT to calculate the emergent property statistics in EPI  
894 to learn distributions on such connectivity parameters of RNNs that execute tasks.

895 Specifically, we solve for the mean field variables  $\kappa_r, \kappa_n, \Delta_0$  and  $\Delta_\infty$ , where the readout is nominally  
896 chosen to point in the unit orthant  $r = \begin{bmatrix} 1 & \dots & 1 \end{bmatrix}^\top$ . The consistency equations for these variables

897 in the presence of a constant input  $h = y - (n - M_n)$  can be derived following [26] are

$$\begin{aligned}
 \kappa_r &= G_1(\kappa_r, \kappa_n, \Delta_0, \Delta_\infty) = M_m \kappa_n + y \\
 \kappa_n &= G_2(\kappa_r, \kappa_n, \Delta_0, \Delta_\infty) = M_n \langle [\phi_i] \rangle + \langle [\phi'_i] \rangle \\
 \frac{\Delta_0^2 - \Delta_\infty^2}{2} &= G_3(\kappa_r, \kappa_n, \Delta_0, \Delta_\infty) = g^2 \left( \int \mathcal{D}z \Phi^2(\kappa_r + \sqrt{\Delta_0}z) - \int \mathcal{D}z \int \mathcal{D}x \Phi(\kappa_r + \sqrt{\Delta_0 - \Delta_\infty}x + \sqrt{\Delta_\infty}z) \right) \\
 &\quad + (\kappa_n^2 + 1)(\Delta_0 - \Delta_\infty) \\
 \Delta_\infty &= G_4(\kappa_r, \kappa_n, \Delta_0, \Delta_\infty) = g^2 \int \mathcal{D}z \left[ \int \mathcal{D}x \phi(\kappa_r + \sqrt{\Delta_0 - \Delta_\infty}x + \sqrt{\Delta_\infty}z) \right]^2 + \kappa_n^2 + 1
 \end{aligned} \tag{78}$$

898 where here  $z$  is a gaussian integration variable. We can solve these equations by simulating the  
 899 following Langevin dynamical system to a steady state.

$$\begin{aligned}
 l(t) &= \frac{\Delta_0(t)^2 - \Delta_\infty(t)^2}{2} \\
 \Delta_0(t) &= \sqrt{2x(t) + \Delta_\infty(t)^2} \\
 \frac{d\kappa_r(t)}{dt} &= -\kappa_r(t) + F(\kappa_r(t), \kappa_n(t), \Delta_0(t), \Delta_\infty(t)) \\
 \frac{d\kappa_n(t)}{dt} &= -\kappa_n + G(\kappa_r(t), \kappa_n(t), \Delta_0(t), \Delta_\infty(t)) \\
 \frac{dl(t)}{dt} &= -l(t) + H(\kappa_r(t), \kappa_n(t), \Delta_0(t), \Delta_\infty(t)) \\
 \frac{d\Delta_\infty(t)}{dt} &= -\Delta_\infty(t) + L(\kappa_r(t), \kappa_n(t), \Delta_0(t), \Delta_\infty(t))
 \end{aligned} \tag{79}$$

900 Then, the chaotic variance, which is necessary for the Gaussian posterior conditioning example, is  
 901 simply calculated via

$$\Delta_T = \Delta_0 - \Delta_\infty \tag{80}$$

902 In addition to the Gaussian posterior conditioning example in Section 3.5, we modeled two tasks  
 903 from Mastrogiuseppe et al.: noisy detection and context-dependent discrimination. We used the  
 904 same theoretical equations and task setups described in their study.

### 905 B.3 Supplementary Figures

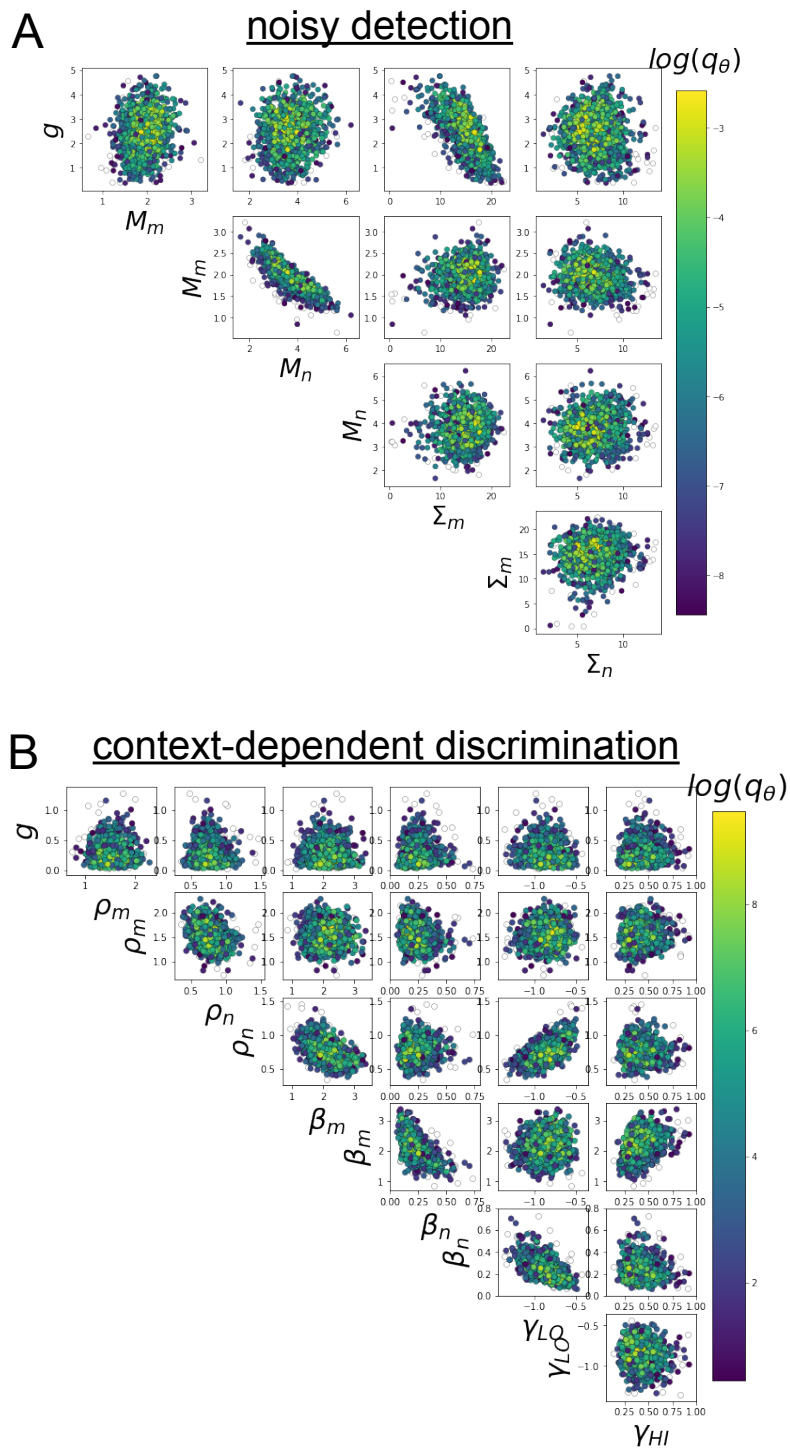

Fig. S4: A. EPI for rank-1 networks doing noisy discrimination. B. EPI for rank-2 networks doing context-dependent discrimination. See [26] for theoretical equations and task description.
